# Visual mate preference evolution during butterfly speciation is linked to neural processing genes

Matteo Rossi<sup>1,2</sup>, Alexander E. Hausmann<sup>1</sup>, Timothy J. Thurman<sup>2,3</sup>, Stephen H. Montgomery<sup>4</sup>, Riccardo Papa<sup>2,5,6</sup>, Chris D. Jiggins<sup>7</sup>, W. Owen McMillan<sup>2</sup> & Richard M. Merrill<sup>1,2\*</sup>

1. Division of Evolutionary Biology, LMU, Munich, Germany; 2. Smithsonian Tropical Research Institute, Panama City, Panama; 3. Division of Biological Sciences, University of Montana, USA; 4. School of Biological Sciences, University of Bristol, Bristol, UK; 5. Department of Biology, University of Puerto Rico, San Juan, Puerto Rico; 6. Molecular Sciences and Research Center, University of Puerto Rico, San Juan, Puerto Rico; 7. Department of Zoology, University of Cambridge, Cambridge UK. \*corresponding author: merrill@bio.lmu.de

**Many animal species remain separate not because they fail to produce viable hybrids, but because they “choose” not to mate. However, we still know very little of the genetic mechanisms underlying changes in these mate preference behaviours. *Heliconius* butterflies display bright warning patterns, which they also use to recognize conspecifics. Here, we couple QTL for divergence in visual preference behaviours with population genomic and gene expression analyses of neural tissue (central brain, optic lobes and ommatidia) across development in two sympatric *Heliconius* species. Within a region containing 200 genes, we identify five genes that are strongly associated with divergent visual preferences. Three of these have previously been implicated in key components of neural signalling (specifically an *ionotropic glutamate receptor* and two *regucalcins*), and overall our candidates suggest shifts in behaviour involve changes in visual integration or processing. This would allow preference evolution without altering perception of the wider environment.**

The evolution and maintenance of new animal species often relies on the emergence of divergent mating preferences<sup>1,2</sup>. Changes in sensory perception or other neural systems must underlie differences in innate behaviours between species, and will ultimately have a genetic

31 basis. However, although the significance of behavioural barriers for speciation has been  
32 recognized since the Modern Synthesis<sup>3</sup>, we know almost nothing of the genes underlying  
33 changes in mating preferences, or variation in behaviours across natural populations more  
34 broadly<sup>4,5</sup>. Identifying these genes will provide an important route towards understanding how  
35 behavioural differences are generated, both during development and across evolutionary time.

36 Previous studies of isolating preference behaviours have largely been limited to the  
37 identification of causal genomic regions, which almost invariably contain many genes<sup>6,7,8,9</sup>.  
38 Only a handful of studies have identified likely candidate genes that contribute to species  
39 behavioural preferences. These are largely limited to chemosensory-guided mating  
40 preferences<sup>10,11,12,13</sup>, and have identified changes at chemoreceptor genes. To our knowledge,  
41 only two studies – in incipient fish species – have identified candidates for visual preference  
42 evolution, albeit indirectly, both suggesting a role for sensory perception mediated by changes  
43 in the peripheral visual system<sup>14,15</sup>. Whether or not visual preference evolution generally  
44 involves shifts at the sensory periphery, or in downstream processing, remains unknown.

45 The closely related species *Heliconius melpomene* and *H. cydno* differ in warning  
46 patterns, which are both under disruptive selection for mimicry<sup>16</sup> and are important mating  
47 cues<sup>17</sup>. In central Panama, *H. melpomene* shares the black, red and yellow pattern of its local  
48 *Heliconius erato* co-mimic. In contrast, *H. cydno* mimics the black and white patterns of *H.*  
49 *sapho*. The two species remain separate largely due to strong assortative mating<sup>18</sup>. Visual  
50 preferences for divergent patterns are particularly apparent in males, which strongly prefer to  
51 court conspecific females<sup>17,19,20</sup>. Differences in warning pattern between *melpomene* and  
52 *cydno* are largely due to expression differences in just three genes, specifically *optix*<sup>21</sup>,  
53 *WntA*<sup>22</sup> and *cortex*<sup>23</sup>.

54 Quantitative trait locus (QTL) mapping of *H. melpomene* and *H. cydno* has revealed  
55 three genomic regions of major effect that influence the relative time males spend courting  
56 red *melpomene* or white *cydno* females<sup>20</sup>. Notably, the best supported QTL was in the same

57 genomic region as *optix*, the gene responsible for presence of the red colour pattern elements  
58 in *H. melpomene*<sup>21</sup>. Genetic linkage will facilitate speciation by impeding the breakdown of  
59 genetic associations between ecological and mating traits<sup>24</sup>. Nevertheless, this QTL, and its  
60 associated candidate region, contain hundreds of genes, and the exact genes responsible for  
61 differences in preference behaviour are not known.

62 Here, we first confirm that the behavioural QTLs identified previously are associated  
63 with variation in male courtship initiation. We then identify genes within the major QTL,  
64 which were differentially expressed in the neural tissue (central brain, optic lobes and  
65 ommatidia) of *H. melpomene* and *H. cydno*, or have protein coding changes predicted to alter  
66 protein function. Out of 200 genes within the QTL region, we identify just five candidates  
67 likely to underlie assortative mating behaviours.

68

## 69 **Results**

### 70 **Chromosome 18 is associated with differences in courtship initiation.**

71 Our previous results reveal that QTLs on chromosomes 1, 17 and 18 influence the relative  
72 time hybrid males spend courting red *melpomene* or white *cydno* females<sup>20</sup>. However, the  
73 time males spend courting a particular female might depend not only on male attraction, but  
74 on the female's response (and in turn his response to her behaviour). To confirm that these  
75 previously reported QTLs influence male approach behaviours (as opposed to other traits that  
76 may influence courtship, for example male morphology<sup>25</sup>), we reanalysed our previous data,  
77 this time explicitly considering whether males initiated courtship towards *melpomene*, *cydno*  
78 or both types of female during choice trials. Consistent with our previous analyses<sup>20</sup>, we  
79 found that F1 and backcross-to-*melpomene* prefer to court *melpomene* females, whereas  
80 courtship initiation behaviours segregate in the backcrosses to *cydno* (Figure 1). Notably,  
81 backcrosses-to-*cydno* males heterozygous at the QTL on chromosome 18 (*i.e.* with a  
82 *melpomene* allele derived from the F1 father) initiated courtship towards *melpomene* females

83 more frequently than males homozygous for the *cydno* allele (Figure 1, bottom left;  $n = 139$ ,  
84  $\Delta\text{ELPD}$ : -10.9 (S.E. $\pm$ 5.1), *i.e.* a change of 2.14 SE units). Together with previous evidence  
85 that male hybrids bearing *melpomene* alleles at *optix* prefer to court the artificial models of  
86 *melpomene* females over those of *cydno*<sup>26</sup>, these results suggest that the QTL on chromosome  
87 18 harbours genes for visual attraction behaviours towards females with the red pattern.  
88 Consequently, we focused our subsequent analyses on this QTL on chromosome 18 (and also  
89 because tight linkage of *optix* allowed us to track the alleles at preference-colour locus in  
90 hybrid crosses). The QTL on chromosome 1 was also retained in our model of initiation  
91 behaviours (Supplementary figure 1;  $n = 139$ ,  $\Delta\text{ELPD} = -13.6$  (SE $\pm$ 5.7), *i.e.* a change of 2.34  
92 SE units), in contrast to the QTL on chromosome 17 which was not retained ( $n = 139$ ,  
93  $\Delta\text{ELPD} = -2.1$  (S.E. $\pm$ 3.0)). Results for the QTL on chromosome 1 are reported in the  
94 supplementary materials (Supplementary table 1).

95

96 **27 genes within the major QTL are differentially expressed in the brains and eyes of *H.***  
97 ***cydno* and *H. melpomene*.**

98 We hypothesized that changes in gene regulation that determine differences in visual mate  
99 preference behaviours might occur during pupal development (for instance, during visual  
100 circuit assembly) or in the imago, and must involve changes in the peripheral and/or central  
101 nervous system<sup>27</sup>. Therefore, we generated RNA-seq libraries for combined eye and brain  
102 tissue, across two pupal stages (around the time of ommochrome pigment deposit and half-  
103 way through pupal development) and one adult stage, for *H. melpomene* and *H. cydno* and  
104 compared their gene expression levels. We found considerable differential expression at the  
105 QTL on chromosome 18 (the QTL spans 2.75 Mb, and contains 200 genes). We identified 27  
106 genes within the QTL region that show differential expression between *melpomene* and  
107 *cydno*, in at least one of the three developmental stages. These were mostly located within the  
108 QTL peak (*i.e.* the genomic region with strongest statistical association with male preference)

109 or in close proximity to *optix* (Figure 2). The same genes were frequently differentially  
110 expressed across development (Supplementary table 1), with 11 genes being differentially  
111 expressed in more than one stage.

112 The genomic region between the start of chromosome 18 and *optix* (comprising the  
113 QTL peak) is highly divergent between *melpomene* and *cydno*<sup>28</sup>, and divergent coding  
114 sequences within this region could also introduce mapping biases of RNA-seq reads. To  
115 account for this, we repeated the analysis having mapped to both the *H. melpomene* reference  
116 genome<sup>29</sup> and to a *H. cydno* genome<sup>30</sup>. Generally, we found similar patterns of differential  
117 expression when mapping to the *H. cydno* genome (Supplementary figure 2, Supplementary  
118 table 2). Nevertheless, in subsequent analyses we excluded two genes, HMEL034187g1 and  
119 HMEL034229g1, which showed reversal of the fold change or did not show differential  
120 expression when mapping to the *H. cydno* genome respectively.

121  
122 ***A regucalcin and an ionotropic glutamate receptor are upregulated in both H. melpomene***  
123 ***and F1 hybrid males.***

124 Our previous behavioural experiments suggest that the alleles for the *melpomene* behaviour  
125 are dominant over the *cydno* alleles<sup>20,26</sup> (Figure 1). Given this pattern of dominance, we  
126 predicted that genes underlying variation in male preference to be up- or down- regulated in  
127 the brains of both *melpomene* and first generation (F1) hybrid males, with respect to *cydno*.  
128 Of the putative genes differentially expressed between *cydno* and *melpomene* reported above,  
129 only four, within the QTL candidate region, were differentially expressed between the F1  
130 hybrids and *cydno* (Figure 2). These included two *regucalcins* (also called *senescence marker*  
131 *proteins-30*: HMEL013552g1, HMEL034199g1), an *ionotropic glutamate receptor*  
132 (HMEL009992g4), which is a putative ortholog of *Grik2*, and one gene with no annotated  
133 function (HMEL009992g1). We obtained the same results regardless of whether we  
134 considered both males and females together, or males alone. Further inspection of spliced

135 mRNA-reads indicated that the two annotated *regucalcins* were in fact a single gene (from  
136 now on referred to as *regucalcin2*). This was also the case for the *ionotropic glutamate*  
137 *receptor* and the gene with no annotated function (from now on referred to as *Grik2*).

138

139 **Differential expression of *Grik2* in adults is likely due to cis-regulatory effects.**

140 To determine whether differences in gene expression levels between parental species were  
141 due to *cis*- or *trans*-regulatory changes, we conducted allele specific expression (ASE)  
142 analyses in adult F1 hybrids. In F1 hybrids, both parental alleles are exposed to the same  
143 *trans*-environment, and consequently *trans*-acting factors will act on alleles derived from each  
144 species equally (unless there is a change in the *cis*-regulatory regions of the respective  
145 alleles). Therefore, differences in allele specific expression indicate changes in *cis*-regulatory  
146 regions<sup>31</sup>. Both candidate genes (*Grik2* and *regucalcin2*) had a very low number of SNPs that  
147 could differentiate the *melpomene* and *cydno* allele (using both gene models of the Hmel2.5  
148 annotation and RABT annotation) and few reads mapped to these SNPs. Nevertheless, for  
149 *Grik2*, the *melpomene* allele was significantly more highly expressed relative to the *cydno*  
150 allele ( $p=0.017$ , Wald test), suggesting *cis*-regulatory effects (Figure 3). For *regucalcin2*,  
151 although there was a tendency towards up-regulation of the *melpomene* allele, consistent with  
152 *cis*-regulation, we did not have sufficient power-to rule out *trans*-only regulatory effects  
153 (Figure 3;  $p=0.108$ , Wald test).

154

155 ***Grik2* is differentially expressed in hybrids that essentially differ only for allelic**  
156 **composition at the behavioural QTL region.**

157 In order to study the specific effects that *melpomene* derived alleles at the QTL on  
158 chromosome 18 had on gene-expression, we introgressed this region into a *cydno* background  
159 through multiple backcrosses (crossing design in Supplementary figure 3). We wanted to  
160 investigate whether differences at this QTL regulated expression of any specific genetic

161 pathway during development, and more generally what changes in genome-wide transcription  
162 were observed in hybrids differing (mostly) just at this QTL region.

163 Notably, in these third-generation backcross hybrid comparisons, across the entire  
164 genome only 23 and 29 genes were differentially expressed (at 156h after pupal formation  
165 (APF) and at 60hAPF, respectively). Of these, 20 and 19 genes (at 156hAPF and at 60hAPF,  
166 respectively) were located on chromosome 18, indicating that gene expression differences in  
167 these comparisons were mostly restricted to the preference-colour region on chromosome 18,  
168 segregating for *cyd/melp* or *cyd/cyd* alleles. No genetic pathway was enriched for gene  
169 expression differences between these hybrids at either pupal stage (PANTHER enrichment  
170 test<sup>32</sup>), suggesting that overall this QTL harbours a few, modular changes in gene regulation  
171 in the developing brain/eyes of *cydno* and *melpomene*. *Grik2* was the only gene detected as  
172 differentially expressed between species and hybrids at these pupal stages (Supplementary  
173 figure 4).

174 To verify that differential expression of candidate genes at the QTL region is driven  
175 by *melpomene* alleles on chromosome 18 and not by other *melpomene* alleles at *trans*-acting  
176 genes on other chromosomes, we compared gene expression levels between hybrids carrying  
177 *cyd/melp* vs. *cyd/cyd* regions on chromosomes chr1, chr4 and chr15, chr20 (Supplementary  
178 figure 5A). In these comparisons, there was no signal of differential expression on  
179 chromosome 18. This supports the *cis*-regulatory activity of the *melpomene* allele of  
180 candidate genes on chromosome 18. To test this further, we conducted another allele specific  
181 expression study in the BC3 hybrids, which suggested *trans*-regulatory effects for *Grik2* at  
182 these pupal stages, but were less conclusive with regard to *regucalcin2* (Supplementary figure  
183 6). Since causal gene/s might exert an effect on behaviour due to their action during  
184 development or in adult form, and this action might in turn be differently (*cis*- vs *trans*-)  
185 regulated, we still considered both genes as strong candidates.

186

187 **4 genes with protein-coding substitutions within the QTL candidate region have**  
188 **predicted effects on protein function.**

189 Because shifts in behavioural phenotypes could be due to changes in protein-coding regions,  
190 we additionally considered protein-coding substitutions between *melpomene* and *cydno*.  
191 Overall, we found 152 protein-coding substitutions, spanning 54 of the 200 genes across the  
192 entire QTL candidate region. We then studied whether these variants were predicted to have  
193 non-neutral effects on protein function with PROVEAN<sup>33</sup>. The PROVEAN algorithm predicts  
194 the functional effect of protein sequence variations based on how they affect alignments to  
195 different homologous protein sequences. We found 4 genes with such predicted effects  
196 (PROVEAN score < -2.5): Specifically, a *WD40*-repeat domain containing protein  
197 (HMEL013551g3), a *cysteine protease* (HMEL009684g2), a *MORN* motif containing protein  
198 (HMEL006660g1), and another *regucalcin* (HMEL013551g4) adjacent to, but distinct from,  
199 that found to be differentially expressed above (from now on referred to as *regucalcin1*).

200

201 **Candidate genes occur in regions with reduced gene flow.**

202 Of our six candidate genes for preference behaviours that contribute to reproductive isolation  
203 between *H. cydno* and *H. melpomene* (*regucalcin2*, *Grik2* and the four genes with protein  
204 coding modifications), five are found within the QTL peak (Figure 4). Genetic changes  
205 causing reproductive isolation between populations are expected to reduce localized gene  
206 flow in their genomes. Therefore, we compared the position of our candidate genes to  
207 estimated levels of admixture proportions ( $f_d$ )<sup>34</sup> between *H. melpomene* and *H. cydno* across  
208 the QTL candidate region<sup>35</sup>. We found that all candidate genes were located in genomic  
209 regions with low  $f_d$  values (Figure 4), suggesting localized resistance to gene flow between  
210 *melpomene* and *cydno* at these genes and their putative *cis*-regulatory regions.

211

212



## 213 Discussion

214 Behavioural isolation is frequently implicated in the formation of new species, and involves  
215 the correlated evolution of both mating cues and mating preference. Here we have analysed a  
216 genomic region in a pair of closely related sympatric butterflies, *H. cydno* and *H. melpomene*,  
217 that contains genes for divergence in both an ecologically relevant mating cue and the  
218 corresponding preference. Physical linkage between ecological and mating traits will facilitate  
219 speciation by allowing different barriers to act in concert to restrict gene flow<sup>36,37</sup>. Although  
220 the genes underlying changes in the warning pattern cue in *Heliconius* are well  
221 characterized<sup>21,22,23,38</sup> (e.g. *optix*), those underlying the corresponding shift in behaviour have  
222 not previously been identified<sup>20,39,40</sup>. We have pinpointed a small number of genes that fall  
223 within the QTL peak, which show either expression (*regucalcin2* and *Grik2*) or protein  
224 coding differences (HMEL013551g3, HMEL009684g2, HMEL006660g1, and *regucalcin1*)  
225 and fall within a region of reduced admixture, that are strong candidates for modulating  
226 mating behaviour.

227 Two broad neural mechanisms could underlie the evolution of divergent visual  
228 preferences, involving changes in either i) detection at the sensory periphery or ii) the  
229 processing and/or integration of visual information. Although *H. melpomene* and *H. cydno*  
230 have the same retinal mosaics/class of photoreceptors<sup>41</sup>, spectral sensitivity in the *Heliconius*  
231 eyes could be altered by filtering pigments<sup>42</sup>, or other physiological processes taking place at  
232 the photoreceptors/sensory periphery, eventually shifting sensitivity towards different  
233 wavelengths (and possibly colour patterns). It has previously been hypothesized that the gene  
234 regulatory networks for ommochrome deposition in the *Heliconius* eyes might have been co-  
235 opted in the wings<sup>43</sup>, where *optix* plays a central role, and therefore that *optix* might play a  
236 role in eye pigmentation in *Heliconius*. However, the protein product of *optix* has not been  
237 detected in pupal or adult retinas of various *Heliconius* species tested<sup>44</sup>, and therefore has no  
238 obvious link to ommochrome deposition in the eyes. More generally, the underlying

239 evolutionary mechanism is unlikely to involve detection at photoreceptors, as this would  
240 probably have a broad effect on downstream processing<sup>2</sup> and alter the visual perception of the  
241 animal's wider environment.

242 The second mechanism, involving changes in the processing, and/or integration, of  
243 visual information, could act through an alteration of neuronal activity or connectivity. For  
244 instance, different levels of gene expression in conserved neural circuits between *melpomene*  
245 and *cydno* may affect overall synaptic weighting and determine whether a signal (e.g. colour  
246 and motion) elicits a motor pattern (response towards a female) or not. Consistent with this  
247 scenario, the composition of ionotropic receptors at post-synapses is a key modulator of  
248 synaptic transmission<sup>45</sup>, implicating *Grik2*. Interestingly, differential expression of ionotropic  
249 glutamate receptors is also associated with variation in social and aggressive behaviours in  
250 vertebrates<sup>46,47</sup>. *Regucalcins* are involved in calcium signalling<sup>48</sup>, which regulates synaptic  
251 excitability and plasticity<sup>49</sup>, and has an important role in axon guidance<sup>50</sup> (albeit alongside  
252 additional roles across a broad range of biological processes), making the two *regucalcins* we  
253 identify strong candidates for behaviour.

254 Changes in the regulation of genes with pleiotropic effects are likely to be less  
255 detrimental compared to changes in their protein-coding sequences<sup>51</sup> (although emerging  
256 evidence has begun to suggest that enhancer/repressor elements may be more pleiotropic than  
257 previously thought<sup>52,53</sup>). Furthermore, there is considerable evolutionary potential in the co-  
258 option of transcription factors/networks<sup>51</sup> that regulate neural patterning or neuron-type  
259 activity, possibly resulting in novel adaptive expression patterns. In line with this,  
260 *Regucalcin2* and *Grik2*, which are differentially expressed in the eyes and brain in both our  
261 species and hybrid comparisons, are likely to be involved in multi-functional processes, such  
262 as calcium signalling and ion transport, and likely have pleiotropic alleles. We also found  
263 evidence of cis-regulatory effects for both genes (albeit not significant for *regucalcin2*),

264 which would be required of the causal genetic change within the QTL, if it were to be in gene  
265 regulation.

266 Despite expectations that non-coding, regulatory loci may provide a flexible route to  
267 divergent mating preferences, we also found substitutions in coding regions at the QTL,  
268 which are predicted to have an effect on protein functioning and therefore remain strong  
269 candidates. These genes include *regucalcin1*, which is distinct from, but located next to,  
270 *regucalcin2* (which is differentially expressed). Notably, the eye transcript of *regucalcin1* was  
271 recently characterized as fast-evolving across *Heliconius* species<sup>54</sup>. Other candidates include a  
272 *cysteine protease*, which functions in protein degradation, and might be linked to behaviour  
273 for example through degradation of neurotransmitters, a *MORN* motif containing protein  
274 (function unknown), and a *WD40* containing protein. *WD-repeat* containing proteins have  
275 been implicated in a wide array of functions ranging from signal transduction to apoptosis  
276 (<https://www.ebi.ac.uk/interpro>).

277 Although preference for red colouration and the *optix* gene are tightly linked, we find  
278 no evidence that *optix* is differentially expressed in the eyes or brains of our two species. It is  
279 also not located within the QTL peak (and it contains no non-synonymous changes in protein  
280 coding regions<sup>21</sup>). It seems unlikely therefore that changes in cue and preference are  
281 pleiotropic effects of the same allele. More generally, although we have pinpointed the  
282 strongest candidates yet identified for assortative mating behaviours in *Heliconius*, it is  
283 possible that actual causal changes in gene regulation are restricted to developmental stages  
284 other than those sampled, or restricted to a few neuronal populations not detected with  
285 transcriptomic data from eyes and whole brain tissue. Nonetheless, by sampling at two pupal  
286 stages (around the time of *optix* expression/ommochrome pigment deposit in the wing/eye and  
287 halfway through pupal development) and at the adult stage, we should have captured  
288 important transitions for the behavioural programming of the two species.

289 Work in the past decade has shown that complex innate behavioural differences  
290 between species can be encoded in relatively few genetic modules<sup>55,56</sup>, but very few  
291 studies<sup>57,58,59</sup> have identified specific genes underlying behavioural evolution. In particular,  
292 traditional laboratory organisms continue to provide important insights into the evolution and  
293 genetics of behaviour<sup>27,58,60</sup>, however, comparative approaches are required to determine if  
294 developmental principles can be broadly applied, and also to incorporate a wider range of  
295 phenotypic variation and sensory modalities. The challenge now is to increase the resolution  
296 of studies in non-traditional systems, in order to link individual genetic elements to  
297 behaviours, *and* the sensory and/or neurological structures through which they are mediated.  
298 In this light, we have identified a small handful of strong candidate genes associated with the  
299 evolution of visual mate preference behaviours in *Heliconius*. These genes are in tight  
300 physical linkage with the locus for the corresponding shifts in an ecologically relevant mating  
301 cue, providing an important opportunity to investigate the build-up of genetic barriers crucial  
302 to speciation. The candidate genes identified seem more likely to alter visual processing or  
303 integration, rather than detection at photoreceptors, consistent with permitting changes in  
304 mate preference without altering perception of the animal's wider environment.

305

## 306 **Materials and Methods**

307 **Courtship initiation analyses.** Butterfly rearing, crossing design and genotyping are  
308 described in detail elsewhere<sup>20</sup>. In brief, we assayed male preference behaviours for *H.*  
309 *melpomene*, *H. cydno*, their first generation (F1) hybrids and backcross to hybrids to both  
310 parental species in standardized choice trials. Males were introduced into outdoor  
311 experimental cages (1x1x2m) with a virgin female of each species and courtship behaviours  
312 recorded. Whenever possible, trials were repeated for each male (median = 5 trials). To  
313 determine whether previously identified QTLs for courtship time contribute to variation in  
314 courtship *initiation* behaviours, we performed a *post-hoc* analysis using categorical models in

315 a Bayesian framework with a multinomial error structure, using the R package *brms*. All  
316 models were run under default priors (non- or very weakly informative). In contrast to our  
317 previous analysis<sup>20</sup>, in which we considered the number of minutes (*i.e.* time) for which  
318 courtship was directed towards *H. cydno* or *H. melpomene* females, here the response variable  
319 was number of trials in which male courtship was *initiated* towards *H. cydno* females only, *H.*  
320 *melpomene* females only, or both female types (hereafter referred to as “*initiation*”). Across  
321 males the median number of trials with a response was 3. Using backcross-to-*cydno* males  
322 only, we fitted *initiation* as a response variable to genotype (*cyd/cyd* or *cyd/melp*) at each  
323 QTL, which were included as separate fixed effects. Individual ID was fitted as random  
324 factor. To test the effect of each QTL on male *initiation*, we compared the saturated model  
325 incorporating all three QTL with reduced models excluding each QTL in turn, using  
326 approximate leave-one-out (LOO) cross-validation<sup>61</sup> as implemented in *brms*, and based on  
327 expected log pointwise predictive density (ELPD). Normal distribution of ELPD can be a  
328 straightforward approximation given our large samples sizes (n=139)<sup>61</sup>. Therefore, we  
329 considered an absolute value of ELPD greater than 1.96 units of its standard error as  
330 indicative of the reduced model being less-informative than the saturated model (95%  
331 confidence). Males that did not initiate courtship to any female across trials were excluded  
332 from analyses, resulting in a dataset of 139 males, from a total of 146 backcross males for  
333 which we had genotype data. Finally, we extracted predictors and credibility intervals for  
334 backcross males with differing genotypes from the minimum adequate model. Credibility  
335 intervals for *H. melpomene*, *H. cydno*, F1 hybrid and backcross to *melpomene* males  
336 displayed in Figure 1 were generated following the same procedures. Raw data and analysis  
337 code are available in the following github repository:  
338 [https://github.com/SpeciationBehaviour/neural\\_genes\\_heliconius.git](https://github.com/SpeciationBehaviour/neural_genes_heliconius.git)

339 **Butterfly collection, rearing and crossing design for expression analyses.** Wild *H.*  
340 *melpomene rosina* and *H. cydno chioneus* individuals were caught along Pipeline Road near  
341 Gamboa, Panama, in the Soberania National Park, and used to establish stocks at the  
342 Smithsonian Tropical Research Institute insectaries in Gamboa. Butterflies were reared in  
343 common garden conditions, in 2x2x2m cages, and provided with fresh *Psiguria* flowers and  
344 10% sugar solution. Larvae were reared on fresh *Passiflora* shoots/leaves until pupation. *H.*  
345 *cydno*, *H. melpomene* and hybrid individuals used for RNA-seq (see below) were reared  
346 concurrently and under the same conditions. F1 hybrids were obtained by crossing a wild-  
347 caught *H. m. rosina* male to an insectary-bred virgin *H. c. chioneus* female.

348 The introgression line was generated by outcrossing a hybrid male with a red forewing  
349 band (crossing design shown in Supplementary figure 3) to virgin *H. cydno* females, over  
350 three generations. The peak of the behavioural QTL reported previously<sup>20</sup> on chromosome 18  
351 (at 0cM) is in very tight linkage with the *optix* colour pattern locus (at 1.2cM), which controls  
352 for the presence and absence of the red forewing band seen in *H. melpomene rosina*. Presence  
353 of the red forewing band is dominant over its absence so that segregation of the red band can  
354 be used to infer genotype at the *optix* locus. Specifically, hybrid individuals with a red  
355 forewing band are heterozygotes for *H. melpomene/H. cydno* alleles at the *optix* locus,  
356 whereas individuals lacking the red band are homozygous for the *cydno* allele. Due to the  
357 tight linkage we expected little recombination between *optix* and QTL peak even after three  
358 generations of introgression, allowing us to infer genotype at the preference-*optix* locus  
359 (which we confirmed with genetic data, see below).

360 **Tissue dissection, RNA extraction and mRNA sequencing.** Eye (ommatidia and retinal  
361 membrane) and brain tissue (central brain and optic lobes) were dissected out of the head  
362 capsule in cold (4 °C) 0.01M PBS solution, at two pupal stages: 60 hours after pupal  
363 formation (60h APF) and 156h APF; and in adults aged 9 - 13 days. We sampled adults at

364 around 10 days of age because by this stage males are mature and frequently court females<sup>62</sup>.  
365 Adult males and females sampled were sexually naive. We decided to sample at 60h APF  
366 because this is the developmental stage at which *optix* is expressed in the wing, so we  
367 hypothesized that it might had also been when *optix* is expressed in the brain. We sampled at  
368 156h APF as a putative stage halfway through pupal development, and at this stage most of  
369 the major neural connections have just been established in the *Heliconius* brain (Stephen  
370 Montgomery, unpublished data).

371 Tissues were stored in RNAlater at 4 °C for 24 hours, and subsequently at -20 °C, until  
372 RNA extraction. Total RNA was extracted using TRIzol Reagent (Thermo Fisher, Waltham,  
373 MA, USA) and a RNeasy Mini kit (Qiagen, Valencia, CA, USA). Samples were treated with  
374 DNase I (Ambion, Darmstadt, Germany). Integrity of total RNA was checked either on an  
375 agarose gel or using an Agilent Bioanalyzer 2100 (Agilent Technologies, Santa Clara, CA,  
376 USA). RNA concentration was measured on a Nanodrop spectrophotometer. Illumina TruSeq  
377 RNA-seq libraries were prepared and sequenced at Edinburgh Genomics (Edinburgh, UK)  
378 with 100 bp paired-end reads. To avoid lane effects the distribution of the species samples  
379 was randomized on the sequencing platform. More detailed information about individuals and  
380 sequencing yields can be found in the Supplementary dataset.

381  
382 **RNA-seq read mapping and differential gene expression analyses.** After a quality control  
383 of RNA-seq reads with FastQC, we trimmed adaptor and low-quality bases using TrimGalore  
384 v.0.4.4 (<https://www.bioinformatics.babraham.ac.uk/projects/>). RNA-seq reads were mapped  
385 to the *H. melpomene* 2.5 genome<sup>29</sup>/annotation<sup>63</sup> using STAR v.2.4.2a<sup>64</sup> in 2-pass mode. We  
386 only kept reads that mapped in ‘proper pairs’ using Samtools<sup>65</sup>. The number of reads mapping  
387 to each gene were estimated with HTseq v. 0.9.1<sup>66</sup> with model “union”, thus excluding  
388 ambiguously mapped reads. Differential gene expression analyses between species/hybrids  
389 were conducted in DESeq2<sup>67</sup>. We considered only those genes showing a 2-fold change in

390 expression level, and at adjusted (false discovery rate 5%) p-values < 0.05, to be differentially  
391 expressed, to exclude expression differences caused by known differences in brain  
392 morphology<sup>68</sup> (Montgomery et al., in prep).

393  
394 **Sexing pupae.** In all DESeq2 analyses, sex was included as a random factor. To sex pupae,  
395 we first marked duplicate RNA mapped reads with Picard  
396 (<https://broadinstitute.github.io/picard/>), and used GATK 3.8<sup>69</sup> to split uniquely mapped reads  
397 into exon segments and trim sequences overhanging the intronic regions. We then used  
398 Haplotype Caller on each individual, using calling and filtering parameters according to the  
399 GATK Best Practices for variant calling on RNA-seq data. The sex of pupal samples was  
400 inferred from the proportion of heterozygous (biallelic) SNPs using the R package SNPstats.  
401 Males (ZZ) were expected to have >> 0% heterozygous sites, whereas females (ZW) to have  
402 0%. Z-linked heterozygosity of the pupal samples (Supplementary table 3) were in line with  
403 expectations (either ~ 0 for females or an order of magnitude higher for males), and matched  
404 heterozygosity of either adult males or females, for which the sex was determined from  
405 external morphology.

406  
407 **Inference of gene function and transcript-based annotation.** Biological functions of  
408 annotated genes were inferred with InterProScan v5<sup>70</sup>, using the corresponding Hmel2.5  
409 predicted protein sequences. InterProScan uses different databases like InterPro, Pfam,  
410 PANTHER, and others, to infer functional protein domains and motifs (based on homology).  
411 To study whether specific biological functions were enriched among genes showing  
412 differential expression among hybrid types, we conducted the PANTHER enrichment test<sup>38</sup>  
413 (with Bonferroni correction for multiple testing) using *Drosophila melanogaster* as the  
414 reference gene function database.



415           Upon detailed inspection of the mapping coverage of spliced RNA-seq reads to the  
416 Hmel2.5 gene annotation, we noticed that some gene models were fragmented, namely, a few  
417 exons that appeared to be spliced together were incorrectly considered distinct genes. To  
418 check that this did not introduced inaccuracies in our differential gene expression analyses,  
419 we re-annotated the *melpomene* genome using the Cufflinks reference annotation-based  
420 transcript (RABT) assembly tool<sup>71</sup> We used the transcriptomic data from both *melpomene* and  
421 *cydno* to reannotate the *melpomene* genome, separately for every developmental stage, and  
422 reconducted the differential gene expression analyses in DESeq2 as described above.  
423 Repeating all comparative transcriptomic analyses using these new annotations (where exons  
424 were correctly considered as part of single genes), we confirmed that both *regucalcin2* and  
425 *Grik2* were differentially expressed in both species and hybrids comparisons.

426

427 **Inference of BC3 hybrids genome composition.** In order to perform comparative  
428 transcriptomic analyses between third-generation backcross hybrids (BC3) segregating at the  
429 QTL on chromosome 18 (crossing design in Supplementary figure 3), we first determined  
430 which genomic regions in these hybrids were heterozygous (*cyd/melp*) or homozygous  
431 (*cyd/cyd*). For this, we inferred variants from RNA-seq reads for each BC3 hybrid  
432 (individually as above), and from the combined *melpomene* and *cydno* samples. For the  
433 species, we used HaplotypeCaller<sup>69</sup> on RNA-seq samples from all developmental stages of  
434 either species, to produce individual genomic records (gVCF), and then jointly genotyped  
435 *melpomene* and *cydno* gVCFs (separately for the two species) using genotypeGVCFs with  
436 default parameters. Genotype calls were filtered for quality by depth (QD) > 2, strand bias  
437 (FS) < 30 and allele depth (DP) > 4. For further analyses we kept *biallelic* genotypes only.  
438 We then used the *intersect* function of *bcftools*<sup>65</sup> to infer variants exclusive to the *cydno* and  
439 to the *melpomene* samples.

440 We calculated the fraction of variants that each BC3 hybrid individual shared with the  
441 *melpomene* and with the *cydno* samples, in non-overlapping 100kb windows. We compared  
442 these to the fraction of variants that a F1 hybrid and a *H. cydno* individual (not included in the  
443 combined genotyping of the *cydno* samples), shared with the same species samples, and found  
444 that they matched either one of them, indicating heterozygous (*cyd/melp*) or homozygous  
445 (*cyd/cyd*) regions (Supplementary figure 5B). In this analysis, we considered only those  
446 100kb windows where BC3 hybrids/F1 hybrid/*H. cydno* individuals shared more than 30  
447 variants with the *melpomene/cydno* samples.

448 To corroborate our findings, we repeated the same type of analysis, this time inferring  
449 species-specific variants for *melpomene* and *cydno* using 10 *H. melpomene rosina* and 10 *H.*  
450 *cydno chioneus* genome resequencing samples. Variant calling files (vcf) were retrieved from  
451 Martin et al<sup>35</sup>. We considered only *biallelic* genotype calls that had  $10 < DP < 100$  and  
452 genotype quality (GQ)  $> 30$ . With this analysis we found the same heterozygous and  
453 homozygous regions in BC3 hybrids.

454 The size and number of the introgressed regions were in line with expectations about  
455 3<sup>rd</sup> generation backcross hybrids following our crossing design: segregating at the level of  
456 chromosome 18 and at four other chromosomes. For the BC3 hybrids sampled at 156 hours  
457 after pupal formation (APF) we had 6 *cyd/melp* and 10 *cyd/cyd* at the QTL region on  
458 chromosome 18 (Supplementary figure 5A), for those at 60h APF, 8 *cyd/melp* and 9 *cyd/cyd*  
459 hybrids at the same region.

460  
461 **Allele-specific expression (ASE) in hybrids.** In order to conduct ASE analyses we first  
462 identified species specific variants, fixed in either *melpomene* and *cydno*. For this, we took  
463 the quality filtered variants inferred from the species genome resequencing data, and assigned  
464 those genotype calls in *cydno* and *melpomene* for which allele frequency (AF) was  $> 0.9$  as

465 homozygous (we did not consider indels in this analysis). We then used *bcftools intersect*<sup>65</sup> to  
466 get only those variants for which *cydno* and *melpomene* had opposite alleles.

467 At the same time, we called variants from RNA-seq reads of F1 hybrid individuals,  
468 again according to the GATK Best Practices (with the exception of parameters -window 35 -  
469 cluster 3, to increase SNPs density), and selected only heterozygous SNPs in F1s that matched  
470 the species-specific variants. Finally, we used GATK's ASEReadCounter<sup>69</sup>, with default  
471 parameters, to count RNA reads in the F1 hybrids (and later on in BC3 hybrids) that mapped  
472 to either the *cydno* or the *melpomene* allele. We summed all reads mapping to either the *cydno*  
473 or *melpomene* allele/variant within the same gene (both for gene models of the Hmel2.5 gene  
474 annotation and for the Cufflinks annotation we assembled previously). To test for allele  
475 specific expression (diffASE) we fitted the model “~0 + individual + allele” in DESeq2<sup>67</sup>,  
476 setting library size factors to 1 (thus not normalizing between samples, as the test for diffASE  
477 is conducted within individuals). We only considered those alleles showing at least a 2-fold  
478 change in expression and  $p < 0.05$ , as differentially expressed.

479 In order to check that there were no biases in alleles assignment to one of the two  
480 species, we analyzed the ratios of the species alleles, for every gene, and checked that they  
481 were not systematically biased to either one of the two species. The  $\log_2$  fold-changes of the  
482 species alleles were centered around 0, suggesting no obvious bias in alleles assignment<sup>72</sup>  
483 (Supplementary figure 7).

484

485 **Protein-coding substitutions and predicted effects on protein-function.** We inferred fixed  
486 variants in protein-coding regions from the combined *melpomene* and *cydno* RNA samples in  
487 order to include variants from genes for which we detected expression in the brain/eyes across  
488 the 3 stages. We took the quality filtered variants called from the joint genotyping of RNA-  
489 seq data of *cydno* and *melpomene* (from all stages), and selected those genotype calls for  
490 which allele frequency (AF)  $> 0.8$ , and where the allelic variant was present in at least 7

491 individuals of the ~30 samples (for each species). We retained those substitutions/indels  
492 validated with the genome resequencing data. For this, of the genotype calls found in RNA  
493 reads from brain/eyes of different stages, we kept only those that were also called in at least 8  
494 of the 10 genome resequencing samples of each species. We considered this overlapping set  
495 of variants as being fixed in *H. melpomene rosina* or *H. cydno chioneus*. Following a similar  
496 approach to Bendesky *et al.*<sup>59</sup>, we then restricted this set of substitutions between *cydno* and  
497 *melpomene* to protein-coding regions, and selected those non-synonymous substitutions that  
498 were considered to have moderate or high effect on protein function, with SNPeff<sup>73</sup>. Finally,  
499 we used the PROVEAN algorithm<sup>33</sup>, to further study the functional effects of these  
500 substitutions on protein function. The PROVEAN algorithm predicts the functional effect of  
501 protein sequence variations based on how they affect alignments to homologous protein  
502 sequences (for this we used the PROVEAN protein database online). We selected those amino  
503 acid changes with the suggested PROVEAN score < -2.5, indicating non-neutral effect on  
504 protein function.

505

506 **Admixture analyses.** We retrieved estimated admixture proportions between *H. melpomene*  
507 *rosina* and *H. cydno chioneus*, for 100kb and 20kb windows, from Martin *et al.*<sup>35</sup>

508

509 **Data accessibility.** RNA-seq data will be deposited on a public database

510 (<https://www.ebi.ac.uk/ena>) on acceptance. Analysis scripts and behavioural data are

511 available at: [https://github.com/SpeciationBehaviour/neural\\_genes\\_heliconius.git](https://github.com/SpeciationBehaviour/neural_genes_heliconius.git)

512

513 **Author contributions:** R.M.M. and M.R. conceived the study and designed the experiments,

514 with input from W.O.M. and C.D.J; M.R. analysed expression and sequence data; A.E.H.

515 analysed the behavioural data; T.J.T., S.H.M. and R.M.M. reared butterflies, dissected neural

516 tissue and extracted RNA; R.M.M., C.D.J. and W.O.M. secured funding, contributed

517 resources and provided supervision; R.P. additionally secured funding and contributed  
518 resources; M.R. and R.M.M. wrote the manuscript with contributions from all authors.

519

## 520 **Acknowledgments**

521 We thank Liz Evans and Adriana Tapia for assistance in the insectaries. We are grateful to  
522 Ana Pinharanda for sharing the *H. cydno* genome assembly and annotation and to Simon  
523 Martin for sharing admixture proportions and comments on the manuscript. We thank the  
524 Smithsonian Tropical Research Institute for providing research infrastructure, the Ministerio  
525 del Ambiente for permission to collect butterflies in Panama, Edinburgh Genomics for  
526 sequencing support and Jochen Wolf who kindly provided computational resources. MR,  
527 AEH and RMM are supported by an Emmy Noether fellowship and research grant awarded to  
528 RMM by the Deutsche Forschungsgemeinschaft (DFG) (Grant Number: GZ: ME 4845/1-1).  
529 RMM was also supported by a Junior Research Fellowship from King’s College Cambridge,  
530 an Ernst Mayr fellowship from the Smithsonian Tropical Research Institute, a Varley-  
531 Gradwell fellowship from the Oxford University Museum of Natural History, and the  
532 Balfour-Browne Fund, University of Cambridge. SHM was supported by a NERC IRF  
533 (NE/N014936/1). This project was also supported by an Institutional Development Award  
534 (IdeA) INBRE from the National Institute of General Medical Sciences (NIGMS) awarded to  
535 RP (Grant number: P20GM103475), and a European Research Council (ERC) awarded to  
536 CDJ (Grant number: 339873).

537

## 538 **References**

- 539 1. Coyne, J. A., Orr, H. A. *Speciation* (Sunderland, MA: Sinauer 2004).
- 540 2. Rosenthal, G. G. *Mate choice* (Princeton University Press, 2017).
- 541 3. Mayr, E. *Animal species and evolution* (Harvard University Press, 1963).
- 542 4. Cande, J., Prud’homme, B. & Gompel, N. Smells like evolution: The role of chemoreceptor  
543 evolution in behavioural change. *Curr. Opin. Neurobiol.* **23**, 152–158 (2013).
- 544 5. Arguello, J. R. & Benton, R. Open questions: Tackling Darwin’s “instincts”: The genetic  
545 basis of behavioural evolution. *BMC Biol.* **15**, 8–10 (2017).

- 546 6. Moehring, A. J. *et al.* Quantitative trait loci for sexual isolation between *Drosophila*  
547 *simulans* and *D. mauritiana*. *Genetics* **167**, 1265–1274 (2004).
- 548 7. Shaw, K. L. & Lesnick S. C. Genomic linkage of male song and female acoustic preference  
549 QTL underlying a rapid species radiation. *Proc. Natl. Acad. Sci. U. S. A.* **106**, 9737–9742  
550 (2009).
- 551 8. Bay, R. A. *et al.* Genetic Coupling of Female Mate Choice with Polygenic Ecological  
552 Divergence Facilitates Stickleback Speciation. *Curr. Biol.* **27**, 3344–3349 (2017).
- 553 9. Shahandeh, M. P., Pischedda, A., Rodriguez, J. M. & Turner, T. L. The genetics of male  
554 pheromone preference difference between *Drosophila melanogaster* and *Drosophila*  
555 *simulans*. *G3 Genes, Genomes, Genet.* **10**, 401–415 (2020).
- 556 10. Gould, F. *et al.* Sexual isolation of male moths explained by a single pheromone response  
557 QTL containing four receptor genes. *Proc. Natl. Acad. Sci. U. S. A.* **107**, 8660–8665 (2010)
- 558 11. Leary, G. P. *et al.* Single mutation to a sex pheromone receptor provides adaptive specificity  
559 between closely related moth species. *Proc. Natl. Acad. Sci. U. S. A.* **109**, 14081–14086  
560 (2012).
- 561 12. Fan, P. *et al.* Genetic and neural mechanisms that inhibit *Drosophila* from mating with other  
562 species. *Cell* **154**, 89–102 (2013).
- 563 13. Brand, P. *et al.* The evolution of sexual signaling is linked to odorant receptor tuning in  
564 perfume-collecting orchid bees. *Nat. Commun.* **11** (2020).
- 565 14. Seehausen, O. *et al.* Speciation through sensory drive in cichlid fish. *Nature* **455**, 620–626  
566 (2008).
- 567 15. Hench, K., Vargas, M., Höppner, M. P., McMillan, W. O. & Puebla, O. Inter-chromosomal  
568 coupling between vision and pigmentation genes during genomic divergence. *Nat. Ecol.*  
569 *Evol.* **3**, 657–667 (2019).
- 570 16. Merrill, R. M. *et al.* Disruptive ecological selection on a mating cue. *Proc. R. Soc. B Biol.*  
571 *Sci.* **279**, 4907–4913 (2012).
- 572 17. Jiggins, C. D., Naisbit, R. E., Coe, R. L. & Mallet, J. Reproductive isolation caused by  
573 colour pattern mimicry. *Nature* **411**, 302–305 (2001).
- 574 18. Jiggins, C. D. Ecological Speciation in Mimetic Butterflies. *Bioscience* **58**, 541–548 (2008).
- 575 19. Jiggins, C. D., Estrada, C. & Rodrigues, A. Mimicry and the evolution of premating  
576 isolation in *Heliconius melpomene* Linnaeus. *J. Evol. Biol.* **17**, 680–691 (2004).
- 577 20. Merrill, R. M. *et al.* Genetic dissection of assortative mating behaviour. *PLoS Biol* **17**,  
578 e2005902 (2018).
- 579 21. Reed, R. D. *et al.* Optix drives the repeated convergent evolution of butterfly wing pattern  
580 mimicry. *Science* **333**, 1137–1141 (2011).
- 581 22. Martin, A. *et al.* Diversification of complex butterfly wing patterns by repeated regulatory  
582 evolution of a Wnt ligand. *Proc. Natl. Acad. Sci. U. S. A.* **109**, 12632–12637 (2012).
- 583 23. Nadeau, N. J. *et al.* The gene cortex controls mimicry and crypsis in butterflies and moths.  
584 *Nature* **534**, 106–110 (2016).
- 585 24. Felsenstein, J. Skepticism Towards Santa Rosalia, or Why Are There So Few Kinds of  
586 Animals? *Evolution* **35**, 124–138 (1981).
- 587 25. Massey, J. H., Chung, D., Siwanowicz, I., Stern, D. L. & Wittkopp, P. J. The yellow gene  
588 influences *Drosophila* male mating success through sex comb melanization. *Elife* **8**, 1–20  
589 (2019).
- 590 26. Merrill, R. M., Van Schooten, B., Scott, J. A. & Jiggins, C. D. Pervasive genetic  
591 associations between traits causing reproductive isolation in *Heliconius* butterflies. *Proc.*  
592 *R. Soc. B Biol. Sci.* **278**, 511–518 (2011).
- 593 27. Seeholzer, L. F., Seppo, M., Stern, D. L. & Ruta, V. Evolution of a central neural circuit  
594 underlies *Drosophila* mate preferences. *Nature* **559**, 564–569 (2018).
- 595 28. Martin, S. H. *et al.* Genome-wide evidence for speciation with gene flow in *Heliconius*  
596 butterflies. *Genome Res.* **23**, 1817–1828 (2013).

- 597 29. Davey, J. *et al.* Major improvements to the *Heliconius melpomene* genome assembly used  
598 to confirm 10 chromosome fusion events in 6 million years of butterfly evolution. *G3* **6**,  
599 695–708 (2015).
- 600 30. Darragh, K. *et al.* A novel terpene synthase produces an anti-aphrodisiac pheromone in the  
601 butterfly *Heliconius melpomene*. *bioRxiv*, 779678 (2019).
- 602 31. Wittkopp, P. J., Haerum, B. K. & Clark, A. G. Evolutionary changes in cis and trans gene  
603 regulation. *Nature* **430**, 85–88 (2004).
- 604 32. Thomas, P. D. *et al.* Applications for protein sequence-function evolution data:  
605 mRNA/protein expression analysis and coding SNP scoring tools. *Nucleic Acids Res.* **34**,  
606 645–650 (2006).
- 607 33. Choi, Y., Sims, G. E., Murphy, S, Miller, J. R. & Chan, A. P. Predicting the Functional  
608 Effect of Amino Acid Substitutions and Indels. *PLoS One* **7** (2012).
- 609 34. Martin, S. H., Davey, J. W. & Jiggins, C. D. Evaluating the use of ABBA-BABA statistics  
610 to locate introgressed loci. *Mol. Biol. Evol.* **32**, 244–257 (2015).
- 611 35. Martin, S. H., Davey, J. W., Salazar, C. & Jiggins, C. D. Recombination rate variation  
612 shapes barriers to introgression across butterfly genomes. *PLoS Biol.* **17**, 1–28 (2019).
- 613 36. Kopp, M. *et al.* Mechanisms of assortative mating in speciation with gene flow: Connecting  
614 theory and empirical research. *Am. Nat.* **191**, 1–20 (2018).
- 615 37. Butlin, R. K. & Smadja, C. M. Coupling, reinforcement, and speciation. *Am. Nat.* **191**, 155–  
616 172 (2018).
- 617 38. Westerman, E. L. *et al.* Aristaless controls butterfly wing color variation used in mimicry  
618 and mate choice. *Current Biology*, **28**, 3469–3474 (2018).
- 619 39. Kronfrost, M. R. *et al.* Linkage of butterfly mate preference and wing color preference cue  
620 at the genomic location of wingless. *Proc. Natl. Acad. Sci. U. S. A.* **103**, 6575–6580 (2006).
- 621 40. Chamberlain, N. L., Hill, R. I., Kapan, D. D., Gilbert, L. E., & Kronforst, M. R.  
622 Polymorphic butterfly reveals the missing link in ecological speciation. *Science*, **326**, 847–  
623 850 (2009).
- 624 41. McCulloch, K. J. *et al.* Sexual Dimorphism and Retinal Mosaic Diversification following  
625 the Evolution of a Violet Receptor in Butterflies. *Mol. Biol. Evol.* **34**, 2271–2284 (2017).
- 626 42. Zaccardi, G., Kelber, A., Sison-Mangus, M. P. & Briscoe, A. D. Colour discrimination in  
627 the red range with only one long-wavelength sensitive opsin. *J. Exp. Biol.* **209**, 1944–1955  
628 (2006).
- 629 43. Monteiro, A. Gene regulatory networks reused to build novel traits. *BioEssays* **34**, 181–186  
630 (2012).
- 631 44. Martin, A. *et al.* Multiple recent co-options of *Optix* associated with novel traits in adaptive  
632 butterfly wing radiations. *Evodevo* **5** (2014).
- 633 45. Kandel, E. R, Schwartz, J. H., Jessell, T. M., Siegelbaum, S. A. & Hudspeth, A. J. *Principles*  
634 *of Neural Science*, 2012th Ed. (New York: McGraw Hill, 2000).
- 635 46. Wang, X. *et al.* Genomic responses to selection for tame/aggressive behaviours in the silver  
636 fox (*Vulpes vulpes*). *Proc. Natl. Acad. Sci. U. S. A.* **115**, 10398–10403 (2018).
- 637 47. Bloch, N. I. *et al.* Early neurogenomic response associated with variation in guppy female  
638 mate preference. *Nat. Ecol. Evol.* **2**, 1772–1781 (2018).
- 639 48. Yamaguchi, M. Role of regucalcin in brain calcium signaling. *Integr. Biol.* **4**, 825–837  
640 (2012).
- 641 49. Berridge, M. J. Neuronal calcium signaling. *Neuron*, **21**, 13–26 (1998).
- 642 50. Bashaw, G. J. & Klein, R. Signaling from axon guidance receptors. *Cold Spring Harb.*  
643 *Perspect. Biol.* **2**, 1–17 (2010).
- 644 51. Prud'homme, B., Gompel, N. & Carroll, S. B. Emerging principles of regulatory  
645 evolution. *Proc. Natl. Acad. Sci. U. S. A.* **104**, 8605–8612 (2007).
- 646 52. Preger-Ben Noon, E. *et al.* Comprehensive Analysis of a cis-Regulatory Region Reveals  
647 Pleiotropy in Enhancer Function. *Cell Rep.* **22**, 3021–3031 (2018).

- 648 53. Lewis, J. *et al.* Parallel evolution of ancient, pleiotropic enhancers underlies butterfly wing  
649 pattern mimicry. *Proc. Natl. Acad. Sci. U. S. A.* **116**, 24174–24183 (2019).
- 650 54. Zhang, W. *et al.* Comparative Transcriptomics Provides Insights into Reticulate and  
651 Adaptive Evolution of a Butterfly Radiation. *Genome Biol. Evol.* **11**, 2963–2975 (2019).
- 652 55. Weber, J. N., Peterson, B. K. & Hoekstra, H. E. Discrete genetic modules are responsible  
653 for complex burrow evolution in *Peromyscus* mice. *Nature* **493**, 402–405 (2013).
- 654 56. Cande, J., Andolfatto, P., Prud'homme, B., Stern, D. L. & Gompel, N. Evolution of Multiple  
655 Additive Loci Caused Divergence between *Drosophila yakuba* and *D. santomea* in Wing  
656 Rowing during Male Courtship. *PLoS One* **7**, 1–10 (2012).
- 657 57. McBride, C. S. *et al.* Evolution of mosquito preference for humans linked to an odorant  
658 receptor. *Nature* **515**, 222–227 (2014).
- 659 58. Ding, Y., Berrocal, A., Morita, T., Longden, K. D. & Stern, D. L. Natural courtship song  
660 variation caused by an intronic retroelement in an ion channel gene. *Nature* **536**, 329–332  
661 (2016).
- 662 59. Bendesky, A. *et al.* The genetic basis of parental care evolution in monogamous mice.  
663 *Nature* **544**, 434–439 (2017).
- 664 60. Auer, T. O. *et al.* Olfactory receptor and circuit evolution promote host  
665 specialization. *Nature*, 1–7 (2020).
- 666 61. Vehtari, A., Gelman, A. & Gabry, J. Practical Bayesian model evaluation using leave-one-  
667 out cross-validation and WAIC. *Stat. Comput.* **27**, 1413–1432 (2017).
- 668 62. Jiggins, C. D. *The ecology and evolution of Heliconius butterflies* (Oxford University Press,  
669 2016).
- 670 63. Pinharanda, A. *et al.* Sexually dimorphic gene expression and transcriptome evolution  
671 provide mixed evidence for a fast-Z effect in *Heliconius*. *J. Evol. Biol.* **32**, 194–204 (2019).
- 672 64. Dobin, A. *et al.* STAR: Ultrafast universal RNA-seq aligner. *Bioinformatics* **29**, 15–21  
673 (2013).
- 674 65. Li, H. *et al.* The Sequence Alignment/Map format and SAMtools. *Bioinformatics* **25**, 2078–  
675 2079 (2009).
- 676 66. Anders, S., Pyl, P. T. & Huber, W. HTSeq-A Python framework to work with high-  
677 throughput sequencing data. *Bioinformatics* **31**, 166–169 (2015).
- 678 67. Love, M. I. Huber, W. & Anders, S. Moderated estimation of fold change and dispersion  
679 for RNA-seq data with DESeq2. *Genome Biol.* **15**, 1–21 (2014).
- 680 68. Montgomery, S. H. & Mank, J. E. Inferring regulatory change from gene expression: the  
681 confounding effects of tissue scaling. *Mol. Ecol.* **25**, 5114–5128 (2016).
- 682 69. McKenna, A. *et al.* The genome analysis toolkit: A MapReduce framework for analyzing  
683 next-generation DNA sequencing data. *Genome Res.* **20**, 1297–1303 (2010).
- 684 70. Finn, R. D. *et al.* InterPro in 2017-beyond protein family and domain annotations. *Nucleic  
685 Acids Res.* **45**, D190–D199 (2017).
- 686 71. Roberts, A., Pimentel, H., Trapnell, C. & Pachter, L. Identification of novel transcripts in  
687 annotated genomes using RNA-seq. *Bioinformatics* **27**, 2325–2329 (2011).
- 688 72. York, R. A. *et al.* Behaviour-dependent cis regulation reveals genes and pathways  
689 associated with bower building in cichlid fishes. *Proc. Natl. Acad. Sci. U. S. A.* **115**, 1081–  
690 1090 (2018).
- 691 73. Cingolani, P. *et al.* A program for annotating and predicting the effects of single nucleotide  
692 polymorphisms, SnpEff *Fly*. **6**, 80–92 (2012).

693  
694  
695  
696



697

## Figures

698 **Figure 1. Genotype at the preference QTL on chromosome 18 influences courtship**  
 699 **initiation.** Ternary plots showing the number of 15-minute choice trials in which courtship was  
 700 initiated towards *melpomene*, *cydno* or both females for different male types. Left ternary axis  
 701 shows proportion of trials where courtship was initiated towards *H. cydno* female only, bottom  
 702 axis towards *H. melpomene* female only, and right axis towards both female species. Orange  
 703 points represent individuals that have inherited at least one *melpomene* derived allele at the  
 704 preference QTL on chromosome 18 (i.e. either *melp/melp* or *cyd/melp*); and blue points  
 705 represent individuals that are homozygous for *cydno* alleles at the preference QTL on  
 706 chromosome 18 (i.e. *cyd/cyd*). Point size is scaled to the number of trials in which the male  
 707 showed a response and a ‘jitter’ function has been applied. 95% credibility intervals (CrIs) for  
 708 all three proportions are shown as hexagons around predictors with lines projecting to  
 709 corresponding values on the three axes.  
 710

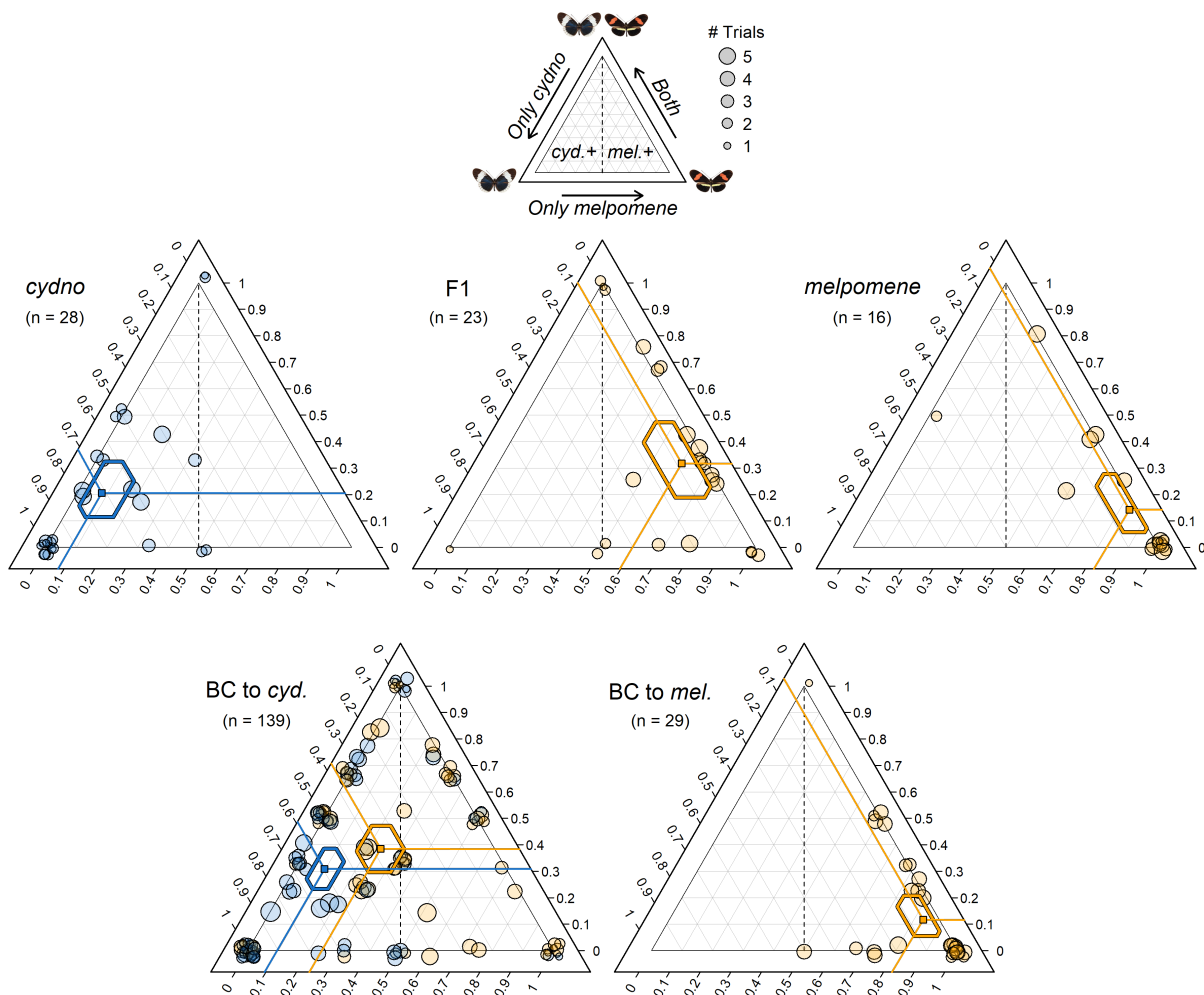

711

712

713

714

715

716

717 **Figure 2. Differential expression at the preference QTL region on chromosome 18.** Left:  
 718 Summary of the comparative transcriptomic analyses with stage, number of samples and  
 719 chromosome 18 composition. Right: the corresponding results, zooming in on the QTL region  
 720 on chromosome 18. The *x*-axis represents physical position. The QTL peak, and the rest of the  
 721 QTL 1.5 LOD candidate region (from<sup>28</sup>) are shown in green and purple, respectively. Points  
 722 correspond to individual genes, with the *y*-axis indicating the  $\log_2(\text{fold-change})$  for each  
 723 comparison. The two horizontal dashed lines (at *y*-values of 1 and -1) indicate a 2-fold change  
 724 in expression. Genes showing a significant 2-fold+ change in expression level between groups  
 725 are highlighted in orange and blue, where orange indicates higher levels in *melpomene* or in the  
 726 hybrids *cyd/melp* (blue if in *cydno* – hybrids *cyd/cyd*). Vertical dashed lines highlight those  
 727 genes that are differentially expressed between *melpomene* and *cydno* AND between *cyd/melp*  
 728 vs *cyd/cyd* individuals, at the same stage. Two genes highlighted by dashed fuchsia vertical  
 729 lines were excluded because they did not show differential expression, or showed reversal of  
 730 the fold change when mapping RNA-seq reads to the *H. cydno* genome. Note that *Heliconius*  
 731 brain (reconstruction) images, added for reference, do not include the eyes (ommatidia and  
 732 retinal membrane).  
 733

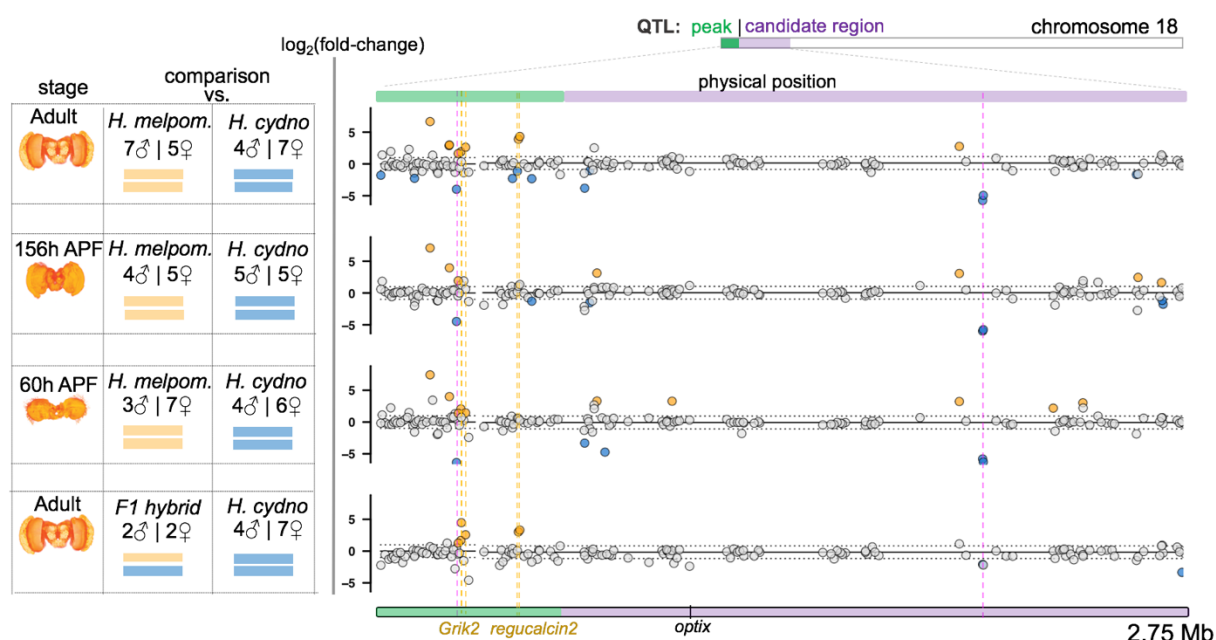

734  
 735  
 736  
 737  
 738  
 739  
 740  
 741  
 742  
 743

744 **Figure 3. *Grik2* and *Regucalcin2* show evidence of allele specific expression.** Points indicate  
 745 the value, and bars the standard error, of the (base 2) logarithmic fold change in expression  
 746 between parental species (horizontal) and the alleles in F1 hybrids (vertical), for candidate  
 747 genes (as defined in the transcript-guided annotation). Dashed lines indicate the threshold for a  
 748 2-fold change in expression for the genes in the species (horizontal), and for the alleles in the  
 749 hybrids (vertical).  
 750

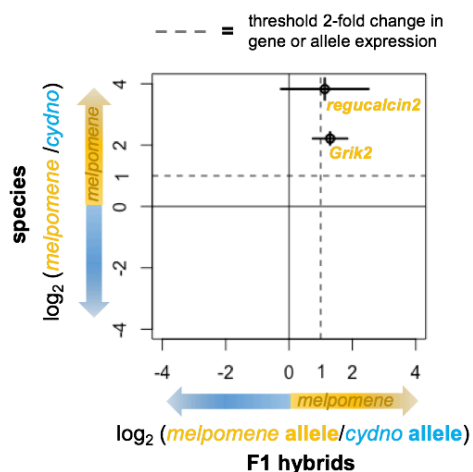

751  
 752  
 753  
 754 **Figure 4. Gene flow at the QTL region for behaviour.** Admixture proportion ( $f_d$ ) values  
 755 estimated in overlapping 100kb (top) and 20kb (bottom) windows for chromosome 18 (top) and  
 756 the QTL region (bottom) between *H. melpomene rosina* and *H. cydno chioneus*, with candidate  
 757 genes positions highlighted by a vertical dashed line, and *optix* location displayed for reference.  
 758 The x-axis represents physical position, the y-axis indicates the  $f_d$  value.  $f_d$  values close to zero  
 759 indicate that the proportion of shared derived alleles, and consequently gene flow, between  
 760 *melpomene* and *cydno* is small (or zero), implying localized selection against foreign alleles  
 761 that introgress between the two species.  
 762

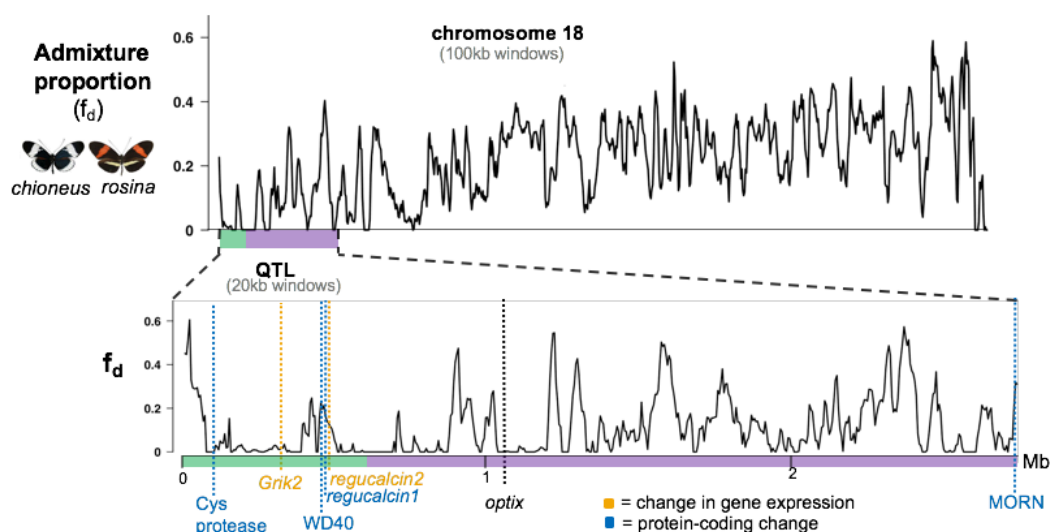

763  
 764

1 **Supplementary information: Visual mate preference evolution**  
2 **during butterfly speciation is linked to neural processing genes**

3  
4 Matteo Rossi<sup>1,2</sup>, Alexander E. Hausmann<sup>1</sup>, Timothy J. Thurman<sup>2,3</sup>, Stephen H. Montgomery<sup>4</sup>,  
5 Riccardo Papa<sup>2,5,6</sup>, Chris D. Jiggins<sup>7</sup>, W. Owen McMillan<sup>2</sup> & Richard M. Merrill<sup>1,2\*</sup>

6  
7 *1. Division of Evolutionary Biology, LMU, Munich, Germany; 2. Smithsonian Tropical Research Institute,*  
8 *Panama City, Panama; 3. Division of Biological Sciences, University of Montana, USA; 4. School of Biological*  
9 *Sciences, University of Bristol, Bristol, UK; 5. Department of Biology, University of Puerto Rico, San Juan,*  
10 *Puerto Rico; 6. Molecular Sciences and Research Center, University of Puerto Rico, San Juan, Puerto Rico;*  
11 *7. Department of Zoology, University of Cambridge, Cambridge UK. \*corresponding author:*  
12 merrill@bio.lmu.de  
13  
14  
15  
16  
17  
18  
19  
20  
21  
22  
23  
24  
25  
26  
27  
28  
29  
30  
31  
32  
33  
34  
35  
36  
37  
38

39  
40  
41  
42  
43  
44  
45  
46  
47  
48  
49  
50  
51  
52  
53  
54  
55  
56  
57  
58  
59  
60  
61  
62  
63  
64  
65

## Supplementary methods and results

**Mapping RNA-seq reads to the *Heliconius cydno* genome.** To determine whether the *H. melpomene* reference genome introduced mapping biases of RNA-seq reads, possibly affecting differential expression estimates, we also mapped to a *H. cydno* assembly/annotation. Generally, we found similar patterns of differential expression when mapping to the two genomes. Since **i)** we observed an equal decrease (~ 40 %) of genes showing 2-fold changes in *melpomene* and *cydno* when mapping to *H. cydno*, at every stage (p-value=0.317 at adult stage, p-value=0.800 at 156h APF, p-value=0.897 at 60h APFP, Fisher's Exact test, **Table S2**), and **ii)** this decrease was widespread throughout the genome, we concluded that the *melpomene* reference genome did not bias differential gene expression analyses.

**Allele-specific expression in the introgression line.** BC3 hybrids had different combinations of chromosomes segregating for the *melpomene* alleles in a *cydno* background. Therefore, in principle, we could not infer *cis-* or *trans-* gene regulatory effects genome-wide from the profiles of allele specific expression (ASE) in these hybrids as for F1 hybrids, due to the diverse trans-acting environments. However, previous analyses (comparing gene expression levels between hybrids carrying *cyd/melp* vs. *cyd/cyd* regions on chromosomes other than 18) imply that differential expression of the candidate genes seems to be driven by the *melpomene* copy difference within the introgressed region on chromosome 18. Therefore, ASE analyses of candidate genes in BC3 hybrids carrying *cyd/melp* alleles on chromosome 18 should indicate whether the differences are due to *cis-* or *trans-*regulatory effects from within the introgressed region (**Figure S6**).

66 In BC3 hybrids sampled at 156h APF and 60hAPF, the *melpomene* and *cydno* alleles of the  
67 *ionotropic glutamate receptor (Grik2)* are expressed at very similar levels (at 156hAPF p  
68 value=0.841, at 60hAPF p value=0.579, Wald test), suggesting trans-only regulatory effects at  
69 these stages for *Grik2*. For *regucalcin1* we again had very few allele-informative read counts  
70 in hybrids at 156h APF. Although there was a tendency towards up regulation of the  
71 *melpomene* allele, there was no statistical significance to support this (p=0.174, Wald test).  
72 We detected diffASE expression of *regucalcin2* only at 60h APF (p <0.001, Wald test), but at  
73 this stage *regucalcin2* was not detected as differentially expressed between pure species.  
74 Thus, although there is tentative evidence for *cis*-regulatory effects for species differences in  
75 *regucalcin* expression during development, it is not conclusive.

76

77

78

79

80

81

82

83

84

85

86

87

88

89

90

91

92  
93  
94  
95  
96  
97  
98  
99  
100  
101  
102  
103  
104  
105

### Supplementary figures

**Figure S1.** Ternary plots showing the number of 15-minute choice trials in which courtship was initiated towards *melpomene*, *cydno* or both females for backcross-to-*cydno* males, with different genotypes at the two QTLs retained in our model (on chromosome 1 and chromosome 18). Left ternary axis shows proportion of trials where courtship was initiated towards *H. cydno* female only, bottom axis towards *H. melpomene* female only, and right axis towards both female species. Each point corresponds to a male (and a ‘jitter’ function applied). Point size is scaled to the number of trials in which the male showed a response. 95% credibility intervals (CrIs) for all three proportions are shown as hexagons around predictors extrapolated from the statistical model with the best fit, with lines projecting to corresponding values on the three axes.

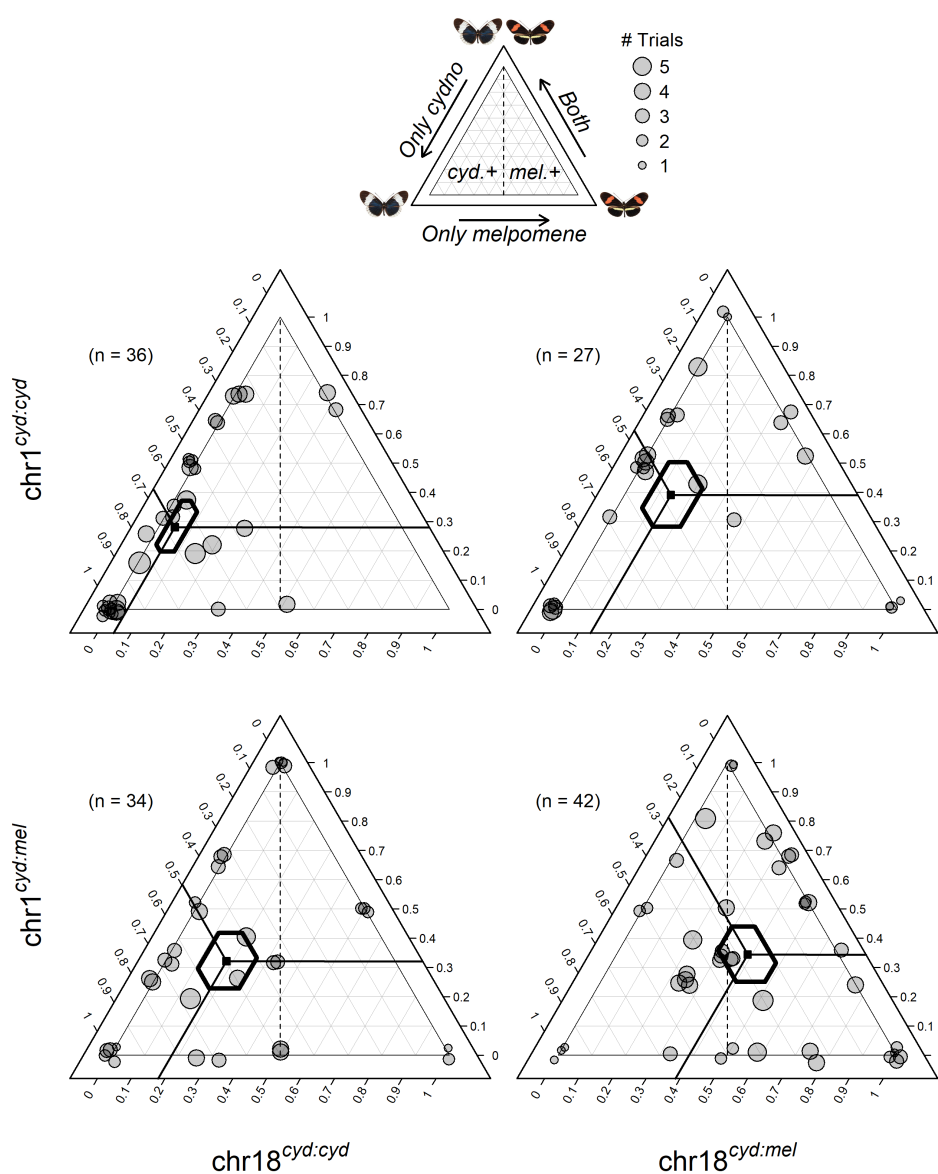

106  
107

108 **Figure S2.** Results of comparative transcriptomic analyses between *melpomene* and *cydno* (in  
 109 the imago) when mapping RNA-seq reads to the *H. melpomene* assembly/annotation (top), and  
 110 to the *H. cydno* assembly/annotation (bottom), zooming in on the QTL region on chromosome  
 111 18. The x-axis represents physical position. Points correspond to individual genes, with the y-  
 112 axis indicating the  $\log_2(\text{fold-change})$  for each comparison. The two horizontal dashed lines (at  
 113 y-values of 1 and -1) indicate a 2-fold change in expression. Genes showing a significant 2-  
 114 fold+ change in expression level between groups are highlighted in orange and blue, where  
 115 orange indicates higher levels in *melpomene*, blue if in *cydno*. Genes detected as differentially  
 116 expressed mapping to both *melpomene* and *cydno* genomes are labelled with gene names.  
 117 dehydr.=2-oxoisovalerate dehydrogenase, OBP=odorant-binding protein.  
 118

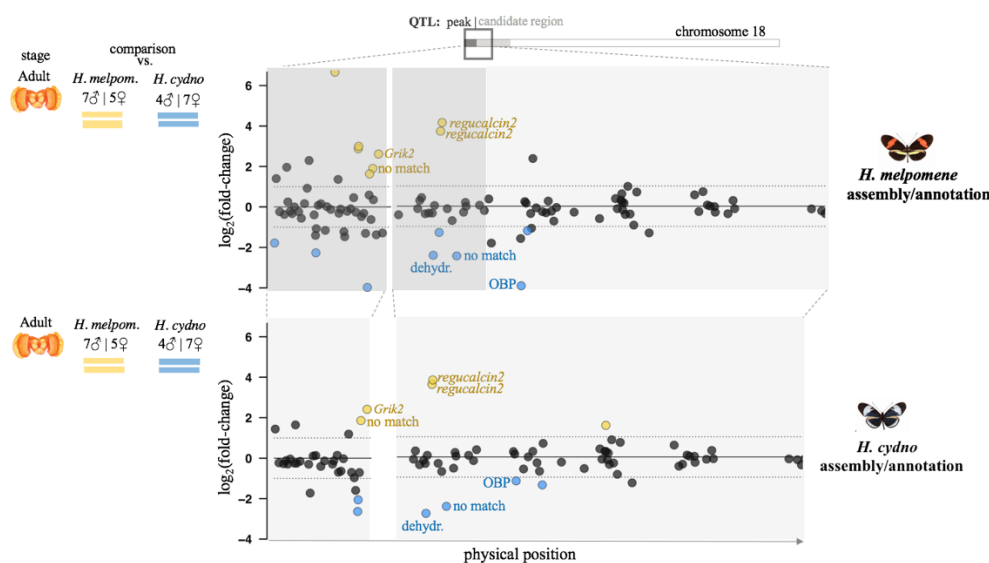

119  
 120

121  
 122  
 123  
 124  
 125  
 126  
 127  
 128  
 129  
 130  
 131  
 132  
 133  
 134  
 135  
 136  
 137  
 138



139 **Figure S3.** Crossing design for producing backcross hybrids segregating at the QTL on  
140 chromosome 18. This introgression line was created by outcrossing a male hybrid to *H. cydno*  
141 females over three generations, selecting a hybrid male that showed a red band on the wing at  
142 each generation. This meant that these males carried one copy of the *H. melpomene* allele at the  
143 *optix* locus. We expected that, following recombination (which occurs in males), by the fourth  
144 generation we would remain with two types of individuals: either *cyd/melp* or *cyd/cyd* at the  
145 level of the *optix* region (which approximately corresponds to the region associated with male  
146 preference behaviour).  
147  
148

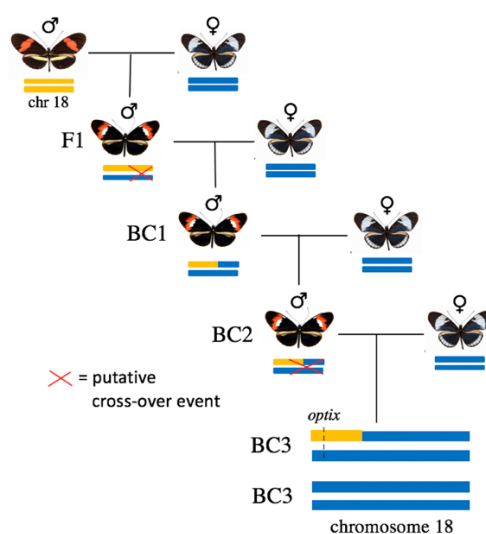

149  
150  
151  
152  
153  
154  
155  
156  
157  
158  
159  
160  
161  
162  
163  
164  
165

166 **Figure S4.** Differential gene expression at the QTL region at pupal stages. Left: summary of  
 167 the comparative transcriptomic analyses with stage, number of samples and chromosome 18  
 168 composition. Right: the corresponding results, zooming in on the QTL region on chromosome  
 169 18. The x-axis represents physical position. The QTL peak, and the rest of the QTL 1.5 LOD  
 170 candidate region are shown in green and purple, respectively. Points correspond to individual  
 171 genes, with the y-axis indicating the  $\log_2(\text{fold-change})$  for each comparison. The two horizontal  
 172 dashed lines (at y-values of 1 and -1) indicate a 2-fold change in expression. Genes showing a  
 173 significant 2-fold+ change in expression level between groups are highlighted in orange and  
 174 blue, where orange indicates higher levels in *melpomene* or in the hybrids *cyd/melp* (blue if in  
 175 *cydno* – hybrids *cyd/cyd*). Vertical dashed lines highlight those genes that are differentially  
 176 expressed between *melpomene* and *cydno* AND between *cyd/melp* vs *cyd/cyd* individuals, at  
 177 the same stage. One gene highlighted by a dashed fuchsia vertical line was excluded because it  
 178 showed reversal of the fold change when mapping RNA-seq reads to the *H. cydno* genome.  
 179

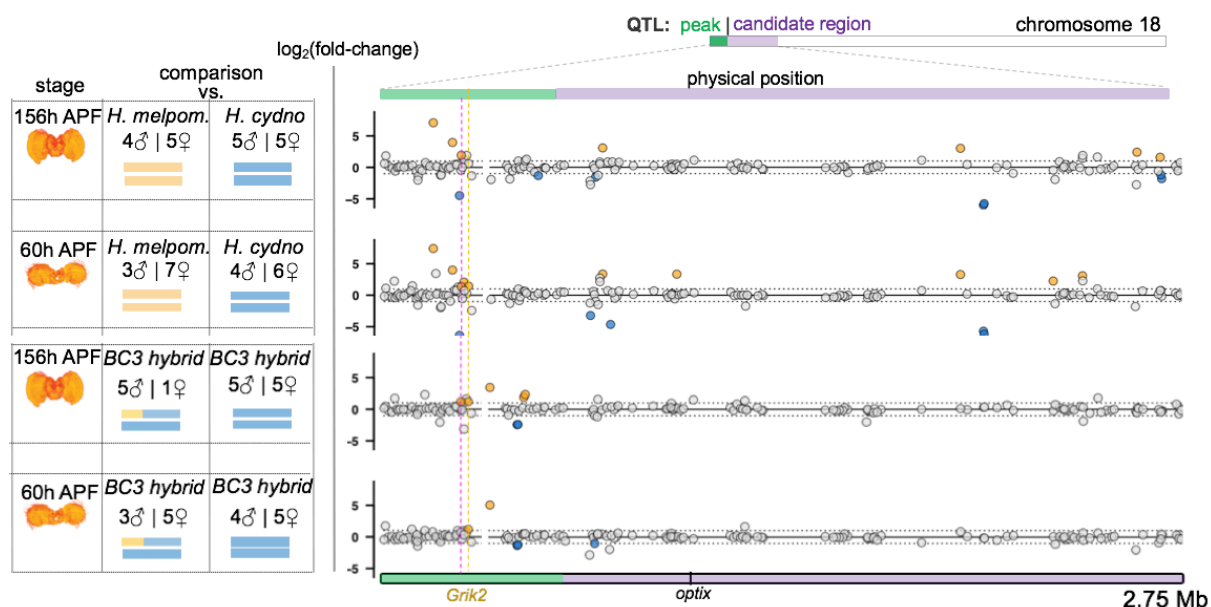

180  
 181  
 182  
 183  
 184  
 185  
 186  
 187  
 188  
 189  
 190  
 191  
 192

193 **Figure S5. A)** Schematic representation of hybrid pupae (sampled at 156h APF) genome  
 194 composition. Columns represent chromosomes, rows represent individuals, orange indicates  
 195 *cyd/melp* regions, blue indicates *cyd/cyd* regions. **B)** Genome composition of (a subset of) BC3  
 196 hybrids. We calculated the fraction of SNPs and indels that each BC3 hybrid, one *cydno* and  
 197 one F1 hybrid samples shared with *melpomene* and *cydno* samples, in non-overlapping 100kb  
 198 windows. x-axes represent physical position (for each chromosome), y-axes fractions of shared  
 199 variants with *melpomene* (in gold) and with *cydno* (in light blue). Matching variant fractions  
 200 between BC3 hybrids and the F1 hybrid, indicating heterozygous regions, are highlighted with  
 201 a gold bar underneath. Note that the general trend of higher number of variants shared with *H.*  
 202 *cydno* in heterozygous regions is due to the fact that we inferred variants by mapping to the *H.*  
 203 *melpomene* genome (and used variant sites only for this analysis).

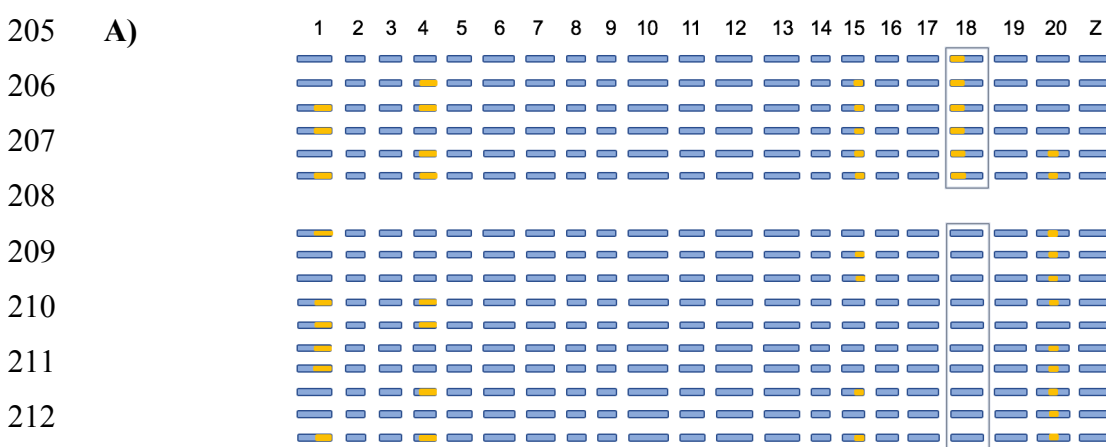

214 **B)**

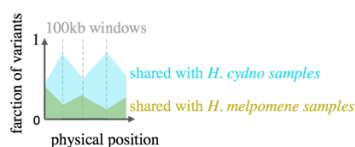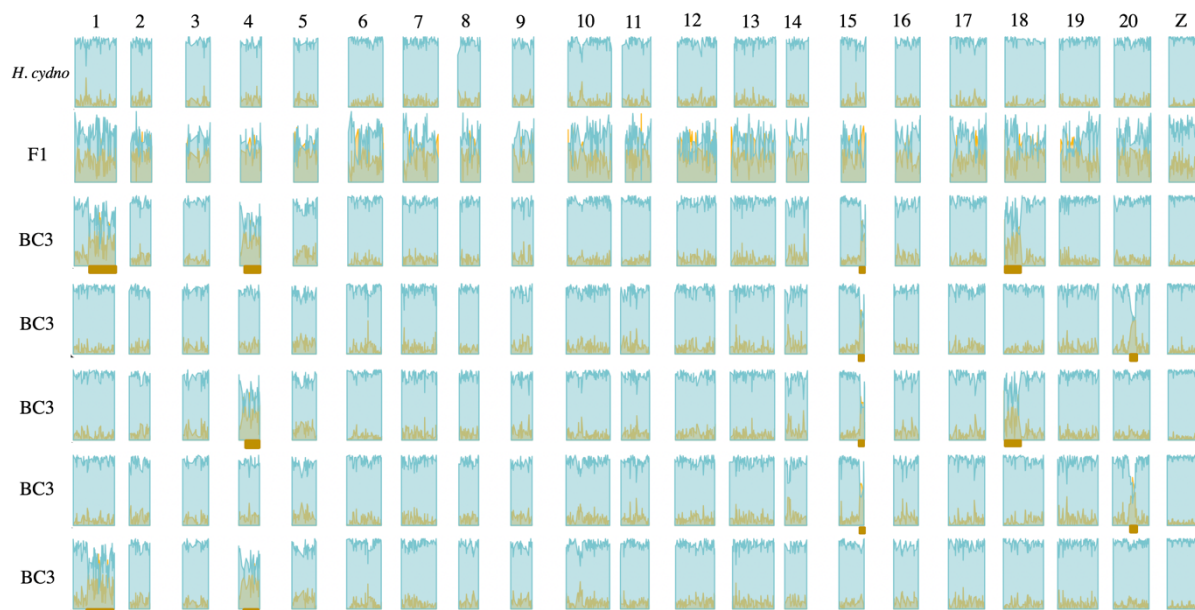

217 **Figure S6.** Allele specific expression profiles of candidate genes at pupal stages. Points indicate  
 218 the value, and bars the standard error, of the (base 2) logarithmic fold change in expression  
 219 between parental species (horizontal) and the alleles in F1 hybrids (vertical), for candidate  
 220 genes (as defined in the transcript-guided annotation). Dashed lines indicate the threshold for a  
 221 2-fold change in expression for the genes in the species (horizontal), and for the alleles in the  
 222 hybrids (vertical).  
 223  
 224

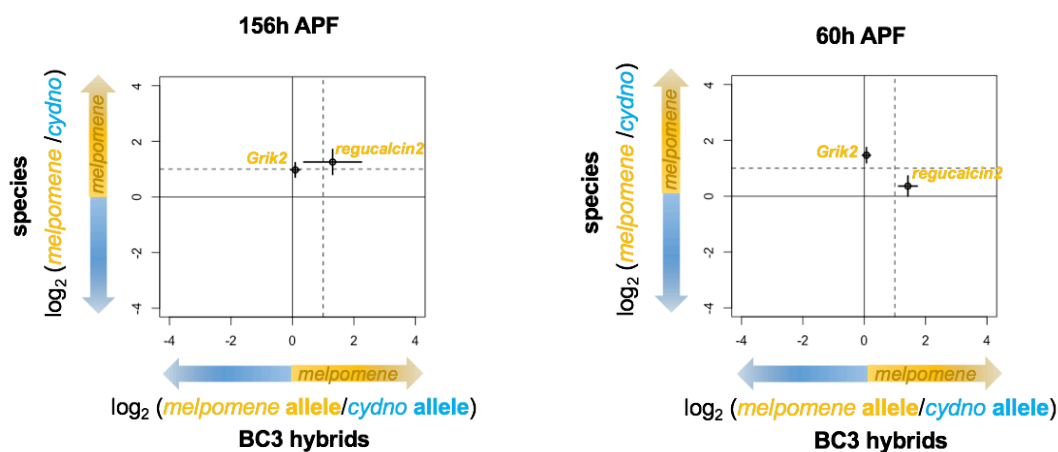

225  
 226  
 227 **Figure S7.** Distribution of the (base 2) logarithmic fold change in allele expression. Coloured  
 228 bars indicate the number of genes showing a bias in expression for the *cydrno* allele (in blue)  
 229 and for the *melpomene* allele (in yellow). Values departing from 0 on the x-axis, indicate an  
 230 increase in the fold change for the *cydrno* allele (negative values) or for the *melpomene* allele  
 231 (positive values), respectively.  
 232

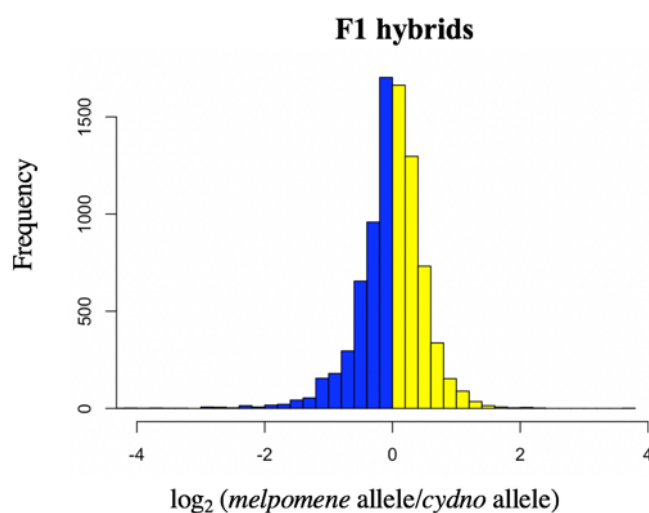

233  
 234  
 235  
 236  
 237

238  
239  
240  
241  
242  
243  
244  
245

### Supplementary tables

**Table S1.** List of differentially expressed genes in species and hybrids comparisons.

**A)** QTL chromosome 1. Orange indicates genes up-regulated in *H. melpomene*, and blue those up-regulated in *H. cydno*.

| #  | Gene name (Hmel2.5) | Annotated function              | Species comparison |          |       |
|----|---------------------|---------------------------------|--------------------|----------|-------|
|    |                     |                                 | 60h APF            | 156h APF | Imago |
| 1  | HMEL002973g1        | No match                        | ✓                  | ✓        | ✓     |
| 2  | HMEL003796g1        | Regulation of enolase protein 1 | ✓                  | ✗        | ✓     |
| 3  | HMEL011272g1        | no match                        | ✗                  | ✓        | ✓     |
| 4  | HMEL030024g1        | Ribonuclease H superfamily      | ✓                  | ✓        | ✓     |
| 5  | HMEL030042g1        | SWR1-complex protein 5          | ✗                  | ✗        | ✓     |
| 6  | HMEL030052g1        | reverse transcriptase           | ✓                  | ✓        | ✓     |
| 7  | HMEL005260g1        | unknown                         | ✗                  | ✓        | ✗     |
| 8  | HMEL030040g1        | No match                        | ✗                  | ✓        | ✗     |
| 9  | HMEL030037g1        | No match                        | ✓                  | ✓        | ✗     |
| 10 | HMEL010076g1        | Amino acid transporter          | ✓                  | ✗        | ✗     |

246  
247  
248  
249  
250  
251  
252  
253  
254  
255  
256  
257  
258  
259  
260  
261  
262  
263  
264  
265  
266  
267  
268  
269  
270  
271

272 **B) QTL chromosome 18.** Those genes found to be differentially expressed when also mapping  
 273 to the *H. cydno* genome are highlighted in bold. Genes annotated as distinct but sharing the  
 274 same number in the table (#) were later found to be single genes (see second paragraph of the  
 275 Results section).  
 276  
 277

| #  | Gene name (Hmel2.5) | Annotated function                                              | Species comparison |          |        | Hybrids comparison |          |        |
|----|---------------------|-----------------------------------------------------------------|--------------------|----------|--------|--------------------|----------|--------|
|    |                     |                                                                 | 60h APF            | 156h APF | Imag o | 60h APF            | 156h APF | Imag o |
| 1  | <b>HMEL009992g1</b> | <b>No match</b>                                                 | ✓                  | ✗        | ✓      | ✗                  | ✗        | ✓      |
| 1  | <b>HMEL009992g4</b> | <b><i>Ionotropic glutamate receptor</i></b>                     | ✓                  | ✗        | ✓      | ✓                  | ✓        | ✓      |
| 2  | <b>HMEL009996g1</b> | <b><i>Gag-related protein</i></b>                               | ✓                  | ✓        | ✓      | ✗                  | ✗        | ✗      |
| 3  | HMEL034168g1        | unknown                                                         | ✗                  | ✗        | ✓      | ✗                  | ✗        | ✗      |
| 4  | HMEL034173g1        | <i>SWR1-complex protein 5</i>                                   | ✗                  | ✗        | ✓      | ✗                  | ✗        | ✗      |
| 5  | HMEL034176g1        | <i>Aspartic peptidase</i>                                       | ✓                  | ✓        | ✓      | ✗                  | ✗        | ✗      |
| 6  | HMEL034184g1        | No match                                                        | ✗                  | ✗        | ✓      | ✗                  | ✗        | ✗      |
| 7  | <b>HMEL034185g1</b> | <b>No match</b>                                                 | ✓                  | ✓        | ✓      | ✗                  | ✗        | ✗      |
| 8  | HMEL034187g1        | <i>Major facilitator superfamily (MFS) transporter</i>          | ✓                  | ✓        | ✓      | ✗                  | ✓        | ✓      |
| 9  | <b>HMEL003176</b>   | <b><i>Odorant binding protein</i></b>                           | ✗                  | ✓        | ✓      | ✓                  | ✗        | ✗      |
| 10 | HMEL013551g1        | <i>2-oxoisovalerate dehydrogenase</i>                           | ✗                  | ✗        | ✗      | ✓                  | ✓        | ✗      |
| 10 | <b>HMEL013551g2</b> | <b><i>2-oxoisovalerate dehydrogenase</i></b>                    | ✗                  | ✗        | ✓      | ✓                  | ✗        | ✗      |
| 11 | HMEL013551g4        | <i>SMP-30/regucalcin</i>                                        | ✗                  | ✗        | ✓      | ✗                  | ✗        | ✗      |
| 12 | <b>HMEL013552g1</b> | <b><i>SMP-30/regucalcin</i></b>                                 | ✗                  | ✗        | ✓      | ✗                  | ✓        | ✓      |
| 12 | <b>HMEL034199g1</b> | <b><i>SMP-30/regucalcin</i></b>                                 | ✗                  | ✗        | ✓      | ✗                  | ✓        | ✓      |
| 13 | HMEL014202g1        | <i>Catalase</i>                                                 | ✗                  | ✗        | ✓      | ✗                  | ✗        | ✗      |
| 14 | <b>HMEL014202g3</b> | <b><i>Catalase</i></b>                                          | ✗                  | ✓        | ✗      | ✗                  | ✗        | ✗      |
| 15 | <b>HMEL034201g1</b> | <b>No match</b>                                                 | ✗                  | ✗        | ✓      | ✗                  | ✗        | ✗      |
| 16 | <b>HMEL034205g1</b> | <b>No match</b>                                                 | ✓                  | ✗        | ✓      | ✗                  | ✗        | ✗      |
| 17 | HMEL034227g1        | <i>Ribonuclease H superfamily</i>                               | ✓                  | ✓        | ✓      | ✗                  | ✗        | ✗      |
| 18 | HMEL034229g1        | <i>Endonuclease/exonuclease/phosphatase superfamily</i>         | ✓                  | ✓        | ✓      | ✗                  | ✗        | ✓      |
| 19 | HMEL034230g1        | No match                                                        | ✓                  | ✓        | ✓      | ✗                  | ✗        | ✗      |
| 20 | <b>HMEL003863g1</b> | <b><i>Vacuolar protein sorting-associated (VPS) protein</i></b> | ✓                  | ✓        | ✗      | ✗                  | ✗        | ✗      |
| 21 | HMEL003863g3        | No match                                                        | ✓                  | ✗        | ✗      | ✗                  | ✗        | ✗      |
| 22 | <b>HMEL006662g1</b> | <b><i>Serpin family protein</i></b>                             | ✗                  | ✓        | ✗      | ✗                  | ✗        | ✗      |
| 23 | <b>HMEL006663</b>   | <b><i>Odorant binding protein</i></b>                           | ✗                  | ✓        | ✗      | ✗                  | ✗        | ✗      |
| 24 | <b>HMEL022553</b>   | <b><i>Odorant binding protein</i></b>                           | ✗                  | ✓        | ✗      | ✗                  | ✗        | ✗      |
| 25 | HMEL001038g1        | <i>Monocarboxylate transporter</i>                              | ✓                  | ✗        | ✗      | ✗                  | ✗        | ✗      |
| 26 | HMEL014190g1        | unknown function                                                | ✓                  | ✗        | ✗      | ✗                  | ✗        | ✗      |
| 27 | HMEL034236g1        | No match                                                        | ✓                  | ✗        | ✗      | ✗                  | ✗        | ✗      |
| 28 | HMEL034189g1        | <i>PiggyBac transposable element-derived protein</i>            | ✗                  | ✗        | ✗      | ✗                  | ✗        | ✓      |
| 29 | HMEL034246g1        | No match                                                        | ✗                  | ✗        | ✗      | ✗                  | ✗        | ✓      |
| 30 | HMEL034195g1        | <i>Gag-related protein</i>                                      | ✗                  | ✗        | ✗      | ✓                  | ✓        | ✗      |

278 **Table S2.** Number of genes showing significant >2-fold change in expression, at different  
279 stages, mapping to the *melpomene* and to the *cydno* genomes. Note that the considerable  
280 reduction in the number of genes detected as differentially expressed when mapping to *H. cydno*  
281 is most likely a result of the lower quality/completeness of the *H. cydno* genome assembly.  
282

| Stage    | Mapping to:         | Up-regulated in<br><i>H. melpomene</i> | Up-regulated in<br><i>H. cydno</i> |
|----------|---------------------|----------------------------------------|------------------------------------|
| Adult    | <i>H. melpomene</i> | 694                                    | 733                                |
|          | <i>H. cydno</i>     | 390                                    | 451                                |
| 156h APF | <i>H. melpomene</i> | 837                                    | 667                                |
|          | <i>H. cydno</i>     | 518                                    | 403                                |
| 60h APF  | <i>H. melpomene</i> | 846                                    | 642                                |
|          | <i>H. cydno</i>     | 490                                    | 376                                |

283  
284  
285  
286  
287  
288  
289  
290  
291  
292  
293  
294  
295  
296  
297  
298  
299  
300  
301  
302  
303  
304  
305  
306  
307  
308  
309  
310  
311

312 **Table S3.** Heterozygosity on the Z-chromosome. Heterozygosity is calculated as proportion of  
 313 variants (SNPs and indels) which are heterozygous, in each sample, rounded at the second  
 314 decimal place (note that variant sites were inferred having mapped to the *H. melpomene*  
 315 genome).  
 316

| <i>H. melpomene</i> |      |         |      | <i>H. cydno</i> |      |         |      |
|---------------------|------|---------|------|-----------------|------|---------|------|
| Males               |      | Females |      | Males           |      | Females |      |
| ID                  | Het. | ID      | Het. | ID              | Het. | ID      | Het. |
| Adults              |      |         |      |                 |      |         |      |
| 45                  | 0.49 | 53      | 0.04 | 57              | 0.23 | 50      | 0.02 |
| 47                  | 0.46 | 78      | 0.05 | 82              | 0.23 | 51      | 0.02 |
| 70                  | 0.47 | 80      | 0.04 | 98              | 0.25 | 58      | 0.02 |
| 71                  | 0.48 | 128     | 0.04 | 99              | 0.24 | 67      | 0.02 |
| 83                  | 0.46 | 218     | 0.05 |                 |      | 68      | 0.01 |
| 100                 | 0.49 |         |      |                 |      | 81      | 0.02 |
| 104                 | 0.46 |         |      |                 |      | 84      | 0.02 |
| 156h APF            |      |         |      |                 |      |         |      |
| 5                   | 0.47 | 6       | 0.05 | 4               | 0.26 | 13      | 0.02 |
| 14                  | 0.49 | 18      | 0.05 | 8               | 0.26 | 21      | 0.04 |
| 17                  | 0.49 | 24      | 0.05 | 142             | 0.30 | 30      | 0.03 |
| 184                 | 0.50 | 150     | 0.05 | 151             | 0.29 | 137     | 0.04 |
|                     |      | 220     | 0.06 | 156             | 0.29 | 168     | 0.04 |
| 60h APF             |      |         |      |                 |      |         |      |
| 92                  | 0.48 | 87      | 0.06 | 85              | 0.26 | 90      | 0.02 |
| 97                  | 0.49 | 95      | 0.05 | 86              | 0.27 | 118     | 0.02 |
| 115                 | 0.47 | 117     | 0.05 | 119             | 0.27 | 125     | 0.02 |
|                     |      | 124     | 0.04 | 146             | 0.26 | 144     | 0.02 |
|                     |      | 149     | 0.06 |                 |      | 162     | 0.02 |
|                     |      | 164     | 0.05 |                 |      | 200     | 0.02 |
|                     |      | 208     | 0.06 |                 |      |         |      |

317

| Hybrids                      |      |         |      |                              |      |         |      |
|------------------------------|------|---------|------|------------------------------|------|---------|------|
| Males                        |      | Females |      | Males                        |      | Females |      |
| ID                           | Het. | ID      | Het. | ID                           | Het. | ID      | Het. |
| F1 hybrids (adults)          |      |         |      |                              |      |         |      |
| 42                           | 0.64 | 56      | 0.05 |                              |      |         |      |
| 49                           | 0.64 | 69      | 0.04 |                              |      |         |      |
| Introgression line -156h APF |      |         |      | Introgression line – 60h APF |      |         |      |
| 105                          | 0.26 | 108     | 0.02 | 152                          | 0.27 | 161     | 0.02 |
| 116                          | 0.27 | 123     | 0.02 | 193                          | 0.27 | 165     | 0.02 |
| 126                          | 0.27 | 136     | 0.02 | 198                          | 0.25 | 179     | 0.02 |
| 131                          | 0.27 | 139     | 0.02 | 199                          | 0.27 | 187     | 0.02 |
| 133                          | 0.26 | 140     | 0.02 | 201                          | 0.26 | 188     | 0.02 |
| 154                          | 0.26 | 166     | 0.02 | 212                          | 0.28 | 192     | 0.02 |
| 155                          | 0.26 |         |      | 215                          | 0.27 | 197     | 0.02 |
| 183                          | 0.27 |         |      |                              |      | 209     | 0.03 |
| 185                          | 0.27 |         |      |                              |      | 214     | 0.02 |
| 189                          | 0.27 |         |      |                              |      | 224     | 0.02 |

318

319

320
